# 1 Historical trade routes for diversification of domesticated chickpea 2 inferred from landrace genomics

3  
4 Anna A. Igolkina<sup>1</sup> <https://orcid.org/0000-0001-8851-9621>

5 Nina V. Noujdina<sup>2</sup> <https://orcid.org/0000-0002-5117-2879>

6 Maria G. Samsonova<sup>1</sup> <https://orcid.org/0000-0003-2530-0395>

7 Eric von Wettberg<sup>3,1</sup> <https://orcid.org/0000-0002-2724-0317>

8 Travis Longcore<sup>5§\*</sup> <https://orcid.org/0000-0002-1039-2613>

9 Sergey Nuzhdin<sup>4\*</sup> <https://orcid.org/0000-0002-9963-151X>

10 <sup>1</sup> Peter the Great St. Petersburg Polytechnic University, St. Petersburg, Polytekhnicheskaya,  
11 29, Russia, 195251

12 <sup>2</sup> USC, Marine Biology

13 <sup>3</sup> Plant and Soil Science and Gund Institute for the Environment, University of Vermont

14 <sup>4</sup> Molecular and Computational Biology, University of Southern California, Los Angeles, CA  
15 90089

16 <sup>5</sup> Spatial Sciences Institute, University of Southern California, Los Angeles, CA 90089 USA

17 <sup>§</sup> current address: UCLA Institute of the Environment and Sustainability

18 \* e-mail: [igolkinaanna11@gmail.com](mailto:igolkinaanna11@gmail.com) or [snuzhdin@usc.edu](mailto:snuzhdin@usc.edu)

## 19 20 Abstract

21  
22 According to archaeological records, chickpea (*Cicer arietinum*) was first domesticated in the  
23 Fertile Crescent 10 thousand years ago. Its subsequent diversification in South Asia, Ethiopia,  
24 and the Western Mediterranean, however, remains obscure and cannot be resolved using only  
25 archeological and historical evidence. In particular, chickpea has two market types: ‘desi’,  
26 which has a similar flower and seed coat color to chickpea’s wild relatives; and ‘kabuli’, which  
27 has light-colored seed, and is linguistically tied to Central Asia but has an unknown geographic  
28 origin.

29  
30 Based on the genetic data from 421 chickpea landraces from six geographic regions, we tested  
31 complex historical hypotheses of chickpea migration and admixture on two levels: within and  
32 between major regions of cultivation. For the former, we developed popdisp, a Bayesian model  
33 of population dispersal from a regional center towards sample locations, and confirmed that  
34 chickpea spread within each region along trade routes rather than by simple diffusion.

35  
36 For the latter, migration between regions, we developed another model, migadmi, that  
37 evaluates multiple and nested admixture events. Applying this model to desi populations, we  
38 found both Indian and Middle Eastern traces in Ethiopian chickpea, suggesting presence of a  
39 seaway from South Asia to Ethiopia — and the cultural legacy of the Queen of Sheba. As for

40 the origin of kabuli chickpeas, we found significant evidence for an origin from Turkey rather  
41 than Central Asia.  
42  
43

## 44 Introduction

45

46 The genetic variation of species reflects evolutionary history. The history of a domesticated  
47 species is inextricably linked with human history and we can learn much about one from  
48 studying the other. Reconstructing the spread of cultigens reveals the history of both plant and  
49 human and has the potential to improve modern genomics-assisted breeding schemes.

50

51 Chickpea (*Cicer arietinum* L.) is an important source of high-quality protein (Abbo et al., 2003a),  
52 ranked third among legumes in terms of grain production (Jain et al., 2013). It is extensively  
53 cultivated in India, West Asia, Eastern Africa, and the Mediterranean Basin, but how it reached  
54 these regions, and its subsequent admixture history is not well-understood. Limiting factors in  
55 reconstructing chickpea domestication history include: (1) lack of whole-genome sequences  
56 from ancient chickpea, (2) reduced genetic diversity in cultivars due to domestication  
57 bottlenecks, (3) the replacement of locally evolving landraces with modern commercial  
58 varieties (Abbo et al., 2003a). The most suitable material for studying chickpea domestication  
59 is the historical germplasm collection made by Vavilov in the 1920s-1930s, stored at the N.I.  
60 Vavilov All Russian Institute of Plant Genetic Resources (VIR). This collection currently contains  
61 3380 chickpea accessions, almost half of which represent pre-Green Revolution landraces with  
62 known geographical origin (Figure 1a). Vavilov not only established this unique collection, but  
63 also identified several “centers of origin” (or diversity) of crop plants (Vavilov, 1926) (Figure  
64 2a). For chickpea, centers of diversity include six regions (van der Maesen, 1984; Vavilov,  
65 1951), which we will denote by the nearest contemporary country: Turkey, Uzbekistan, India,  
66 Lebanon, Morocco, and Ethiopia. We assembled a panel of 421 chickpea landraces which  
67 represent these regions (Figure 1a) and tested historical hypotheses of chickpea diversification  
68 based on genotyping at 2579 loci.

69

70 Chickpea centers of diversity have rich archaeological records, and several domestication  
71 scenarios have been proposed based on these. The wild progenitor of *C. arietinum* is *C.*  
72 *reticulatum*, a rare species found in a small area of south-eastern Turkey (Abbo et al., 2003a).  
73 Because Turkey (and Syria) also harbor several archaeological sites with the earliest remains of  
74 cultivated chickpea (ca 9500 ybp) (Abbo et al., 2003b; Tanno and Willcox, 2006), this region is  
75 generally accepted as the origin of chickpea. Based on the archaeological records, chickpea  
76 then spread throughout ancient world, reaching western-central Asia (Uzbekistan) and the  
77 Indus Valley ca 6000 ybp, the Mediterranean basin (Lebanon, Morocco) ca 5500 ybp, and  
78 Ethiopia ca 3500 ybp. While the chickpea migration relationships between Turkey, Lebanon,  
79 India and central Asia are supported by archeological records, the exact dispersal and  
80 admixture history of chickpea within the Mediterranean Basin and to Ethiopia are anyone’s  
81 guess.

82

83 The *C. arietinum* L. history gets more complicated due to the presence of two distinct types:  
84 'desi' and 'kabuli', which differ in size/morphology, color and surface of seeds (Purushothaman  
85 et al., 2014) (Figure 1a). Desi and kabuli types have sometimes been designated as subspecies  
86 *microsperma* and *macrosperma*, respectively (Moreno and Cubero, 1978), although these  
87 older taxonomic terms do not reflect a crossing boundary or substantial molecular genetic  
88 differentiation (Varma Penmetsa et al., 2016). The desi type is considered to be ancestral and  
89 resembles wild progenitors (*C. reticulatum* and *C. echinospermum*) more than kabuli. It was  
90 proposed that kabuli was once selected from the local desis, and then spread; however, the  
91 region of origin is not known.

92

93 We utilized the genotyped landraces from Vavilov's collection to test the ambiguities in  
94 chickpea history and reconstruct migration routes of both desi and kabuli types in the following  
95 way. We first obtained robust estimates of allele frequencies in 10 chickpea populations (6  
96 desis: Turkey, Uzbekistan, India, Lebanon, Morocco, and Ethiopia, and 4 kabulis: Turkey,  
97 Uzbekistan, Lebanon, and Morocco). For this purpose, we developed the **popdisp** model  
98 (**population dispersals**), which considers geographical locations of chickpea sampling sites, the  
99 nonequal number of samples in locations, and, most crucially, possible ways of chickpea  
100 dispersals within a region. We examined two hypothetical dispersals for each of 10 populations  
101 and get estimates of allele frequencies in populations' centers. Then, we used these  
102 frequencies to test admixture events in the Ethiopia and Morocco desi chickpea, as well as two  
103 different hypotheses about the geographical origin of kabuli varieties and their admixtures  
104 with local desis. For these tests, we developed the **migadmi** method (**migrations and**  
105 **admixtures**), which, instead of existing approaches (TreeMix (Pickrell and Pritchard, 2012) and  
106 MixMapper (Lipson et al., 2013)) can cope with more than two source populations and  
107 estimate multiple and nested admixture events.

108

109



110 Results

111

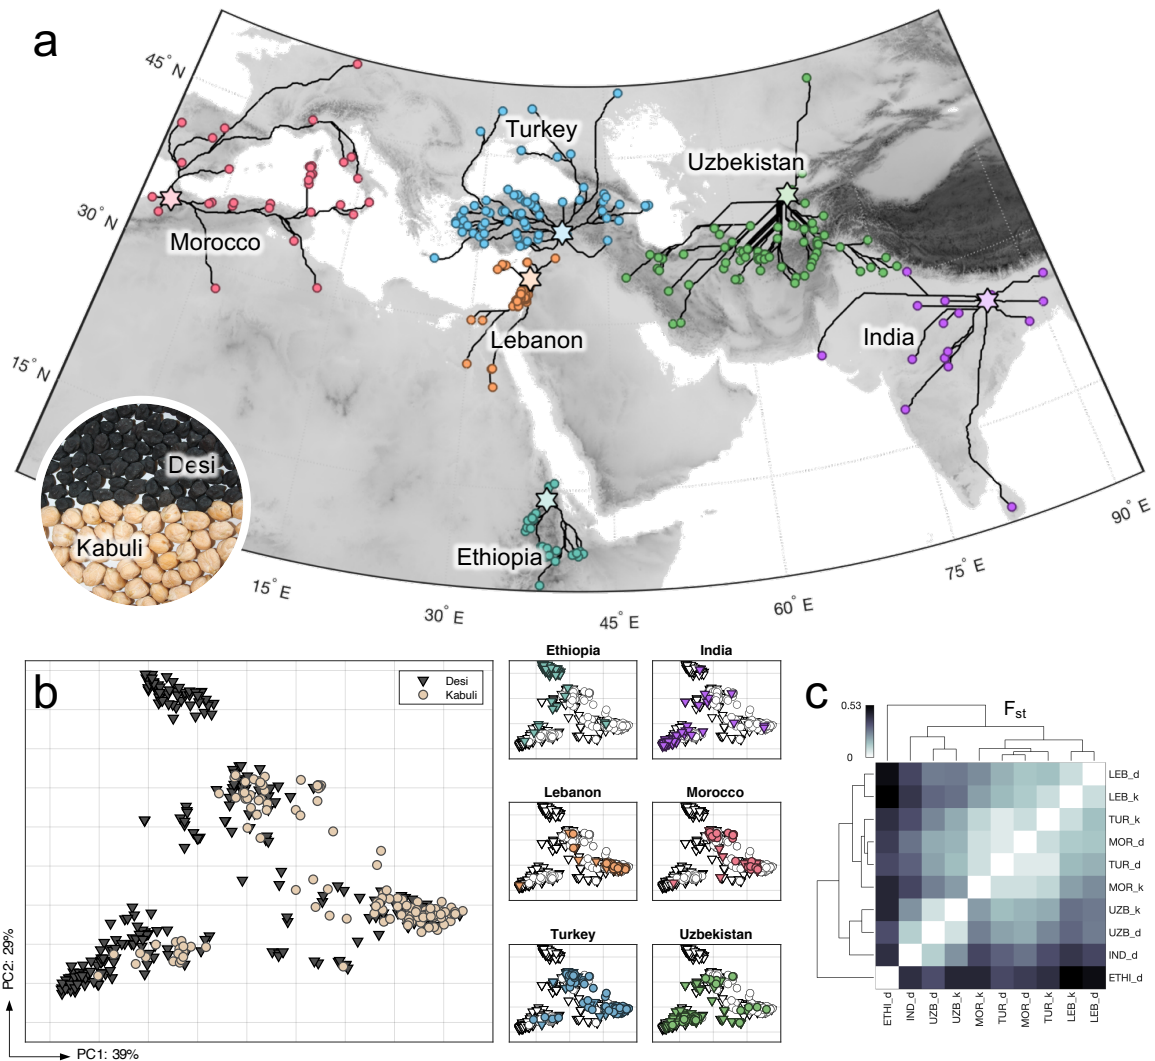

112

113

114 **Figure 1.** (a) Sampling locations of chickpea accessions (circles) and estimated trade routes  
115 from the centers of clusters (stars) to locations. Each net of routes represents a binary tree.  
116 Photo shows the morphological differences between seeds of desi and kabuli chickpea types.  
117 (b) PCA plots for accession based on SNP data separately colored by chickpea type (left) and  
118 by regions (right). (c) Mean pairwise  $F_{st}$  comparison of 10 chickpea subpopulations.

119

120

121

122 *Population structure*

123

124 The chickpea dataset consists of 421 samples (landraces), which can be separated into ten  
125 subpopulations based on origin (Turkey, Uzbekistan, India, Lebanon, Morocco, or Ethiopia) and  
126 chickpea types (desi and kabuli); there are no kabulis among Ethiopian and Indian landraces in

127 our historical collection (Figure 1a). PCA analysis of samples demonstrated 4 clusters  
128 imperfectly correlated with geography, except one cluster with a specific signal to the Ethiopia  
129 desis (Figure 1b). The first principal component mostly reflected the difference between desi  
130 and kabuli (Figure 1b; see distribution of variance explained in Supplementary File 1). Analysis  
131 of the mean pairwise  $F_{st}$  values demonstrated that 10 populations are split into 3  
132 subpopulations reflecting the geographic proximity and overshadowing two chickpea types  
133 (Figure 1c): [Turkey-Lebanon-Morocco], [India-Uzbekistan], and Ethiopia. The PCA and  $F_{st}$   
134 results are in line with the previous attempt (Varshney et al., 2019) to decipher the migration  
135 and domestication history of chickpea accessions that also revealed region-specific clustering  
136 and no clear patterns of desi/kabuli differentiation.

137

138 A hierarchical clustering of the landraces based on SNP distance confirmed (Supplementary  
139 File 1) that desi-kabuli separation is imperfect, and landraces from different geographical  
140 regions are also mixed. To detect unknown population structure we used ADMIXTURE  
141 (Alexander et al., 2009), but this did not reveal a clear number of ancestral populations in our  
142 dataset (K): the cross-validation error monotonically decreased with no minimum while  
143 increasing K from 1 to 20. Similar to the  $F_{st}$  analysis, ADMIXTURE plots for K=3 and K=7  
144 (Supplementary File 1) indicated visually distinct geographic patterns (Turkey-Lebanon-  
145 Morocco, India, Uzbekistan, and Ethiopia) but not desi/kabuli separation.

146

147

148

149

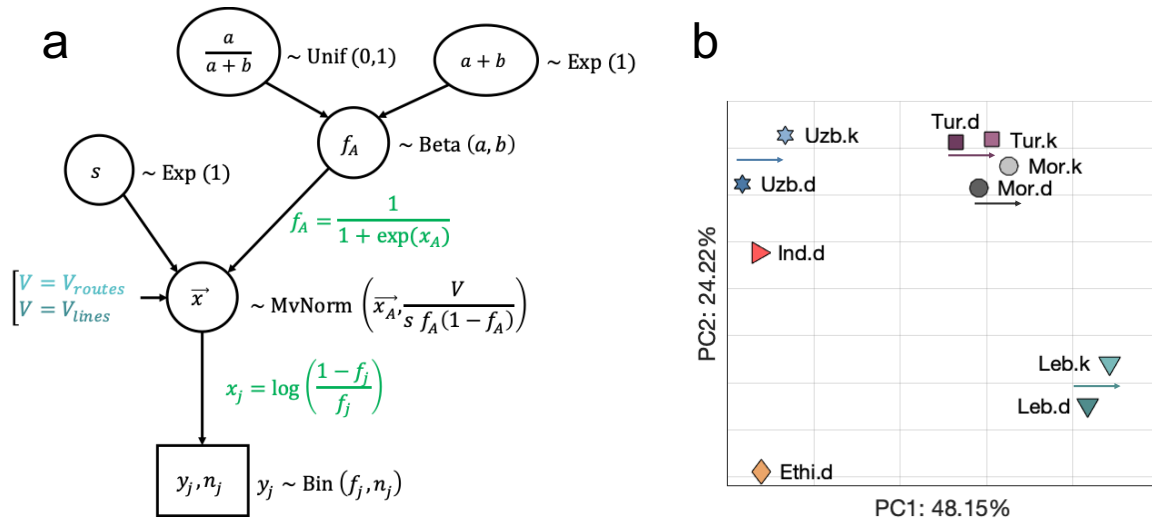

150

151

152 **Figure 2. (a)** Popdisp, the hierarchical Bayesian model describes the spread of chickpea  
 153 population within each region. We consider that a region consists of  $J$  sampling locations  
 154 connecting together by a binary path from the center towards locations.  $j$ -th location is  
 155 characterized with  $y_j$  allele counts in  $n_j$  genotyped variants;  $y_j$  and  $n_j$  are known values. We  
 156 assume that  $y_j$  is a result of Binomial sampling with  $n_j$  trials and  $f_j$  probability of success (the  
 157 allele frequency in the location). Allele frequencies, as fractions or percentages, are  
 158 constrained (i.e. sum up to 1 or 100%), which requires the transformation of all  $f_j$  into  $x_j$  being  
 159 in line with BEDASSLE (Bradburd et al., 2013) and compositional data analysis (CoDA)  
 160 (Aitchison, 1986; Pawlowsky-Glahn and Buccianti, 2011). The vector  $\vec{x}$  follows the multivariate  
 161 normal distribution, its mean is the transformed allele frequency in the center,  $x_A$ , and the  
 162 covariance matrix is proportional to covariance matrix  $V$  reflecting the binary path. We tested  
 163 different paths: constructed under the ‘trade routes’ hypothesis and ‘linear’ hypotheses. Allele  
 164 frequency in the center has the Beta prior distribution with  $\alpha$  and  $\beta$  parameters. **(b)** PCA plot  
 165 of allele frequencies estimated under the ‘trade routes’ hypothesis. Arrows represent the shift  
 166 from desi to kabuli populations within one region.

167

### 168 *Chickpea dispersals within geographic regions*

169

170 Prior to testing migrations and admixtures for 10 chickpea populations: 6 desis (from Lebanon,  
 171 Morocco, Turkey, Uzbekistan, India, and Ethiopia) and 4 kabulis (from Lebanon, Morocco,  
 172 Turkey, and Uzbekistan), we estimated allele frequencies in them. Due to the non-uniform  
 173 distribution of sampling locations in regions and nonequal number of samples in each location,  
 174 mean allele frequencies in each population can be biased as mean statistics are sensitive to  
 175 outliers. To get more robust estimates, we developed a model, **popdisp** (Figure 2a), which  
 176 considers different scenarios for dispersals within a geographic region and takes into account  
 177 landrace-specific effects. The structure of the model was inspired by BayPass (Gautier, 2015),

178 and processing of allele frequencies was performed as in BEDASSLE (Bradburd et al., 2013) and  
179 compositional data analysis (CoDA) (Pawlowsky-Glahn and Buccianti, 2011).

180 We hypothesized that each region had one trade center, where chickpea was first introduced,  
181 and considered two scenarios for subsequent dispersal within the region. In the first scenario,  
182 dispersal within each region proceeded by the transport of seeds to local villages via roads and  
183 paths. As a result, the genetic relatedness in local landraces would be predicted by the net of  
184 regional trade routes. This scenario was contrasted with simple diffusion, so that genetic  
185 differences between landraces would be explained by geodesic distance. We called these two  
186 scenarios “trade routes” and “linear”, respectively (Figure 2a).

187

188 For each region, the center of diffusion was assumed to be the ancient city closest to the  
189 geographical mean center for landraces sampled in the region: Axum (Ethiopia), Volubilis  
190 (Morocco), Diyarbakir (Turkey), Heliopolis (Lebanon), Ayodhya (India), and Marakanda  
191 (Uzbekistan). Then, we constructed two possible contrast binary paths from centers towards  
192 sampling sites. The first was estimated using a ‘least-cost’ model, which have emerged as an  
193 explanatory framework reflecting transportation routes in archaeology (Figure 1a). The second  
194 was constructed using a neighbour-joining algorithm based on linear distance from sampling  
195 sites to the center. Differences between paths for regions are shown in Supplementary File 2.

196

197 We estimated SNP frequencies in 10 populations under the trade routes and linear scenarios  
198 separately and discriminated between them by the Bayes factor (BF, a ratio of the likelihoods).  
199 In all cases (except the Lebanon desi population) the “trade route” scenario was strongly  
200 favored (Supplementary File 6). Therefore, we concluded that the dispersal from trade centers  
201 to farming villages within regions occurred along the ‘trade route’ travel paths and took allele  
202 frequency estimates based on this model for further analysis. PCA analysis of the obtained  
203 frequencies demonstrated both splitting of populations into geographic subgroups and  
204 desi/kabuli differentiation (Figure 2b). Moreover, all kabuli populations are close to their  
205 regional desis, but shifted in one direction along the first PC axis. This may reflect a common  
206 origin.

207

208

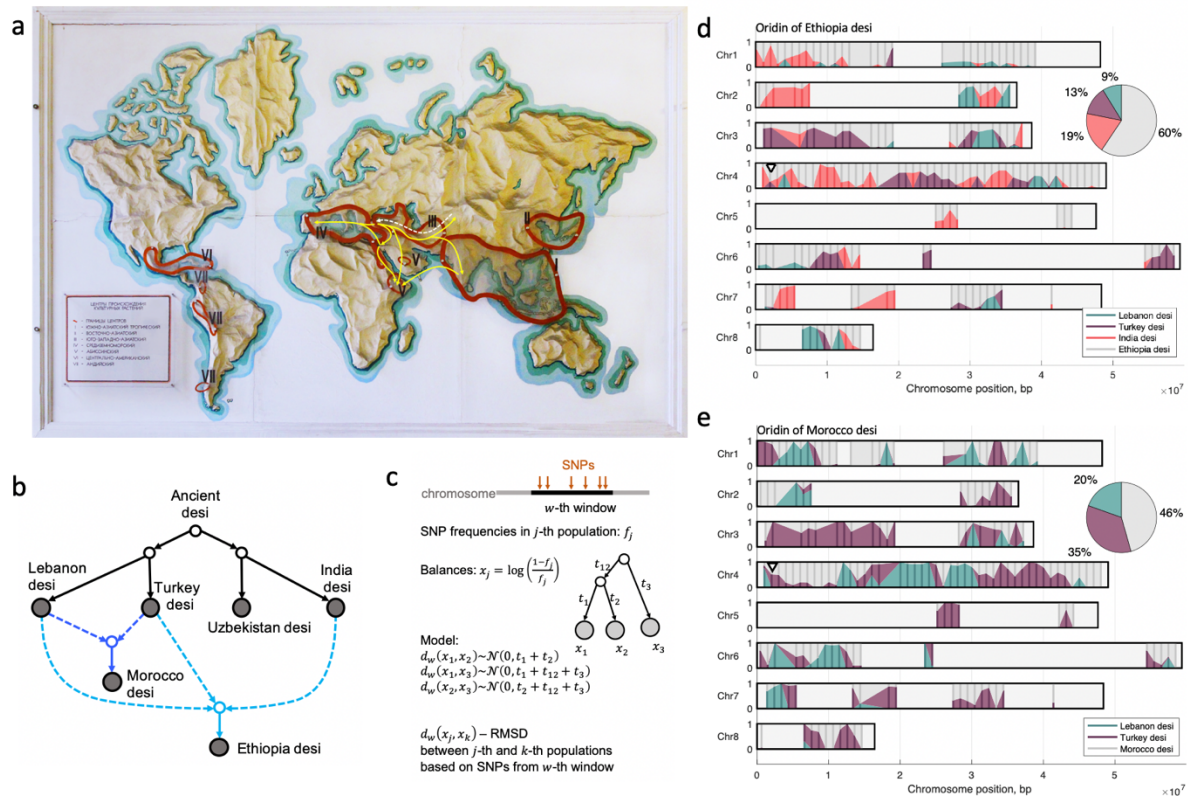

209  
210

211 **Figure 3.** Possible spread of desi between centers of domestication. (A) Vavilov's centers of  
212 domestication (outlined in red) and our hypothesized paths of the desi spread shown as yellow  
213 lines (some of which are known and some are tested). The map is from the Vavilov Institute of  
214 Plant Genetic Resources (Photo: A. Igolkina). (B) Model of desi's spread: black lines are known  
215 paths of diffusion; we tested the two pathways colored light and dark blue. (C) Parametrization  
216 of an admixture event in our model. First, we split each chromosome in a sliding window  
217 technique; each  $w$ -th window is a set of SNPs. Instead of vectors of SNP frequencies for  
218 populations, we use vectors balances. We assume that the distance between vectors of  
219 balances shortened to the window follows the normal distributions with covariance equal to  
220 the corresponding admixture tree's distance. (D) Distribution of the contribution of Lebanon  
221 (green), Turkey (purple), and India (red) ancestral desi populations into Ethiopian desi along  
222 chromosomes. (E) Distribution of contribution of Lebanon (green) and Turkey (purple) desi  
223 ancestral populations into Moroccan desi along chromosomes.

224

### 225 *Origin of desi landraces in Morocco and Ethiopia*

226

227 The desi chickpea type resembles the wild progenitor and is considered ancestral. Its spread  
228 between regions is partly known from archaeology: chickpea was domesticated in Turkey and  
229 then introduced into India, Uzbekistan and Lebanon. We set these four populations as sources  
230 with known phylogeny (black-coloured subtree in Figure 3b). Ethiopian and Moroccan chickpea  
231 desi populations appeared later, and their sources are not known (Figure 3a).

232



233 Two alternative hypotheses exist about the chickpea colonization of Ethiopia. Based on  
234 Ethiopian national legend, the Queen of Sheba, a mysterious figure in the Hebrew Bible, is the  
235 “founder” of Ethiopia. The Bible tells the story about her visit to Jerusalem (the Gospels of  
236 Matthew 12:42, and Luke 11:31), that is in line with Ethiopians highlanders having a clear  
237 Semitic connection exemplified by their Semitic language group (Amharic) and genetic  
238 similarity with Jewish people (Behar et al., 2010). Based on this, chickpea in Ethiopia might  
239 have a Middle Eastern origin. On the other hand, Ethiopian landraces are smaller-seeded and  
240 dark-colored, like most Indian varieties. This suggests a South Asian origin of chickpea in  
241 Ethiopia. Thus, the genome of these Ethiopian varieties could be admixed with alleles traced  
242 back to ancestral populations from Turkey and Lebanon or India. A similar question stands for  
243 Moroccan chickpea landraces (Mediterranean Basin), with contributions from either Turkey or  
244 Lebanon or both.

245  
246 Existing methods, like TreeMix (Pickrell and Pritchard, 2012) and MixMapper (Lipson et al.,  
247 2013), are not sufficient to test complex historical hypotheses of the chickpea dispersion  
248 directly. First, neither of these tools allow both admixed and source populations to diverge  
249 after the admixture event. Second, they limit the number of source populations to 2. Third,  
250 while TreeMix can estimate multiple admixture events, and MixMapper can cope with two  
251 nested admixtures, there is no tool that can do both. Finally, neither tool considers directly the  
252 irregularity of admixture traces along the genome, which can be pronounced if the admixture  
253 event happened far in the past. We developed a new method, **migadmi** (Figure 3c), which  
254 overcomes the above-mentioned limitations. We also applied TreeMix and MixMapper to our  
255 dataset and compared their results with ours (Appendix 6).

256  
257 For Ethiopian desis, the dominant source is India (19%), which has a contribution that is almost  
258 as large the cumulative contribution of Lebanon and Turkey desis, 21% (Figure 3d). Thus more  
259 than a half of Ethiopian desi’s variance is not represented in ancestral populations, which is in  
260 line with the previous analysis, where Ethiopia represents a distinct cluster (Figure 1b,c). These  
261 predictions are in agreement with TreeMix results indicating [Turkey-Lebanon] and India  
262 origins of Ethiopian desi, while MixMapper suggests that Ethiopian desi is a mixture of desi  
263 from Turkey (60%) and India (40%) (Appendix 6). In spite of general agreement of migadmi  
264 predictions with TreeMix and MixMapper, we believe that this newly introduced method  
265 provides more realistic picture of chickpea colonization in Ethiopia as it takes into account  
266 accumulation of individual variances in both mixed and source populations after the admixture  
267 event and is able to decompose the variance of mixed population along the chromosomes.  
268 Indeed, our analysis demonstrated that non-uniformity of admixture events along chickpea’s  
269 chromosomes is strongly pronounced - some regions are admixed by only one source  
270 population (e.g. the beginning of chromosome 3 and the middle of chromosome 4 have mainly  
271 contribution from Turkish desi population), while other regions have input from several (Figure  
272 3d).

273

274 We found that Moroccan desis are derived from both Turkish (35%) and Lebanese (20%)  
275 sources (Figure 3e). This result supports the hypothesis of multiple migration routes from West  
276 Asia towards Morocco around the Mediterranean Basin. The TreeMix analysis identified  
277 Moroccan desi with the Turkish-Lebanese clade (closer to Turkish populations, than Lebanese)  
278 with possible India admixture. MixMapper suggested that Moroccan desis are of Turkish origin  
279 with an admixture of Lebanese (98%) and Indian (2%) desis (Appendix 6). As the Indian desi  
280 influence on Moroccan desi is small, we concluded again that migadmi predictions of a  
281 Moroccan origin generally agree with predictions of TreeMix and MixMapper but provide  
282 additional information about admixture traces along the chromosomes.

283

284

285

286

287

288

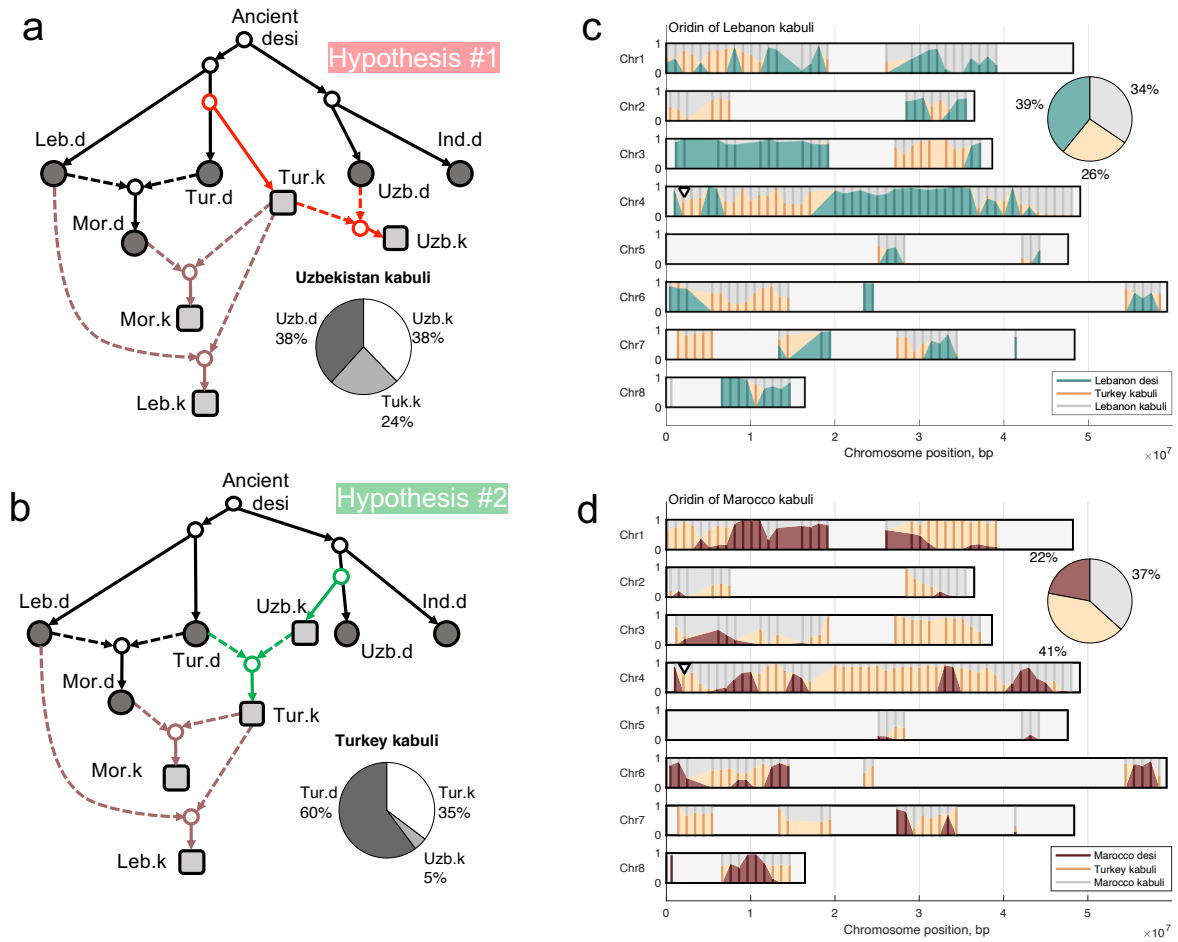

289  
 290  
 291  
 292  
 293  
 294  
 295  
 296  
 297  
 298

**Figure 4.** Analysis of the origin of kabuli chickpeas. (a) Paths of kabuli movement assuming that they originated in Turkey. The pie plot reflects the decompositions of Uzbekistan kabuli variance. (b) Paths of kabuli movement assuming that they originated in Uzbekistan (Kabul). The pie plot reflects the decompositions of Turkish kabuli variance. (c) Decomposition of the Lebanon kabuli origin along the chromosomes. (d) Decomposition of the Moroccan kabuli origin along the chromosomes. Triangle marks chromosomal regions associated with kabuli.



299 *Origin of kabuli chickpea*

300

301 The origin of kabuli domestication is unknown. Based on linguistic evidence, one may  
302 hypothesize that kabulis arose in Central Asia, and are named after Kabul city (in modern  
303 Afghanistan). On the other hand, it is logical to suggest that kabulis arose in West Asia (modern  
304 Turkey) but later than desis, as kabulis are distributed in regions neighboring to Turkey and  
305 have long been thought to be modern introductions to India and Ethiopia(van der Maesen,  
306 1984). Multiple geographic origins are possible. Although desis and kabulis have much in  
307 common, modern breeding programs generally keep them separate, likely due to differences  
308 in adaptive requirements and market preferences (Purushothaman et al., 2014; Roorkiwal et  
309 al., 2014; Varshney et al., 2019).

310

311

312

313

314

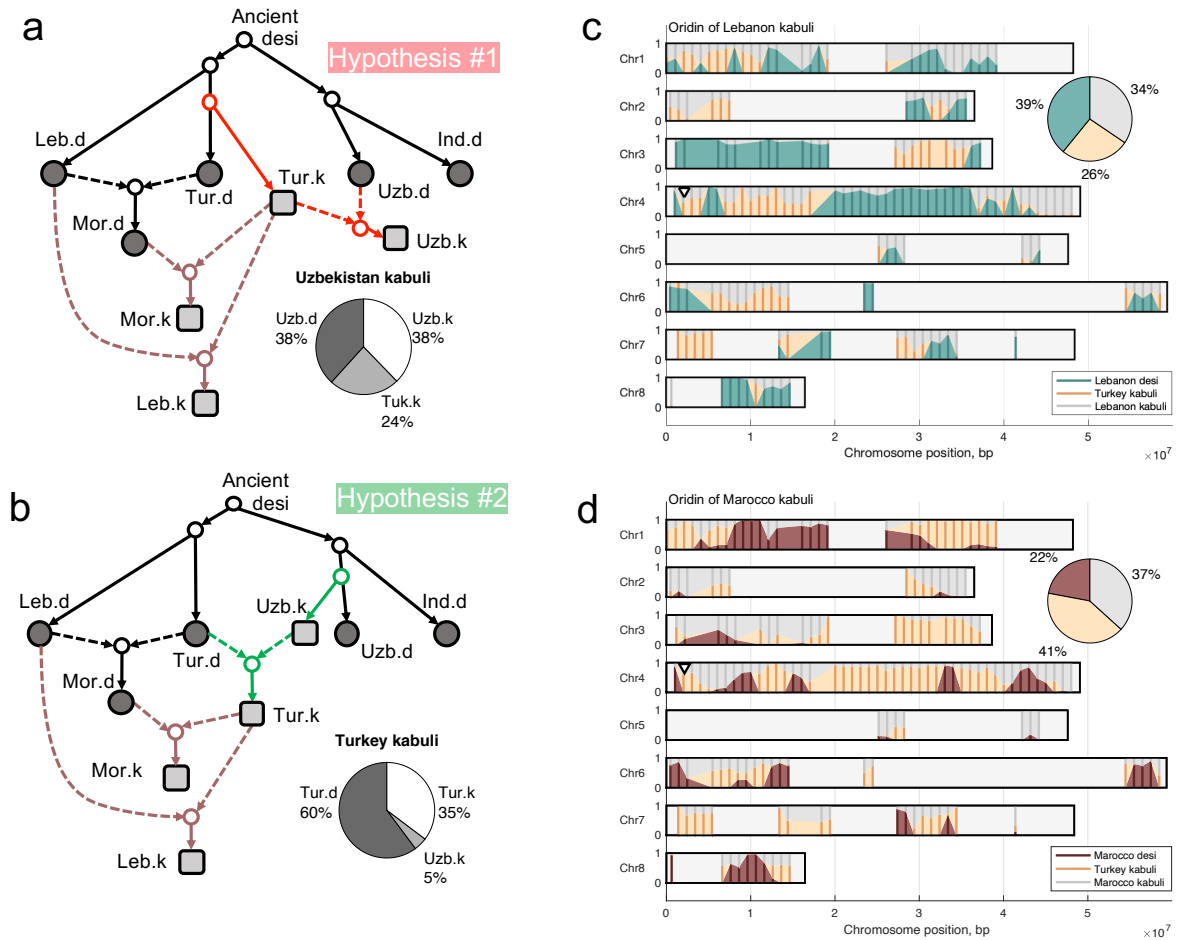

315  
316  
317  
318  
319  
320  
321  
322  
323  
324

**Figure 5.** Analysis of the origin of kabuli chickpeas. (a) Paths of kabuli movement assuming that they originated in Turkey. The pie plot reflects the decompositions of Uzbekistan kabuli variance. (b) Paths of kabuli movement assuming that they originated in Uzbekistan (Kabul). The pie plot reflects the decompositions of Turkish kabuli variance. (c) Decomposition of the Lebanon kabuli origin along the chromosomes. (d) Decomposition of the Moroccan kabuli origin along the chromosomes. Triangle marks chromosomal regions associated with kabuli.

## 325 *Origin of kabuli chickpea*

326

327 The origin of kabuli domestication is unknown. Based on linguistic evidence, one may  
328 hypothesize that kabulis arose in Central Asia, and are named after Kabul city (in modern  
329 Afghanistan). On the other hand, it is logical to suggest that kabulis arose in West Asia (modern  
330 Turkey) but later than desis, as kabulis are distributed in regions neighboring to Turkey and  
331 have long been thought to be modern introductions to India and Ethiopia (van der Maesen,  
332 1984). Although desis and kabulis have much in common, modern breeding programs  
333 generally keep them separate, likely due to differences in adaptive requirements and market  
334 preferences (Purushothaman et al., 2014; Roorkiwal et al., 2014; Varshney et al., 2019).  
335 Because desi type is considered to be more primitive and ancestral it is not unreasonable to  
336 assume that kabuli's spread between centers of secondary diversification had an influence  
337 from local desis. However, both kabuli's origin and migration history with possible desi  
338 influences remain unclear.

339

340 To identify the origin of kabulis, we draw alternative admixture graphs of population  
341 relatedness. The first assumes the dispersal of kabuli chickpea from Turkey's Fertile Crescent  
342 (Figure 4a) and the second reflects a Central Asian origin (modern Uzbekistan) with subsequent  
343 movement back to Turkey (Figure 4b). Parameters for the black-coloured part of the graphs in  
344 Figure 4a,b were taken from the previous analysis of desi populations, the remaining  
345 parameters were estimated with the **migadmi** model. The optimal likelihood of the former  
346 graph is higher, but not significantly. Therefore, to determine the kabuli's origin, we analysed  
347 fractions of variance in each mixed population explained by its sources.

348

349

350 Under the Central Asian assumption of kabuli origin, the influence of Uzbeki kabuli on Turkish  
351 kabuli is very small (5%), while, under the Turkey origin hypothesis, the influence of Turkish  
352 kabuli on Uzbeki kabuli was about 5 times larger (24%) (pie plots in Figures 5a,b). The larger  
353 contribution of assumed source to a kabuli population indicates Turkey as the likely origin of  
354 kabuli. The analysis of PCA plot (Figure 2c) demonstrated the shift of all kabuli populations  
355 along the first PC axis, and the direction of this shift is not "towards Uzbekistan." TreeMix  
356 analysis did not reveal significant patterns of kabuli admixture, while the MixMapper indicated  
357 the same pattern as we found (Appendix 6). Overall, we do not observe support for a kabuli  
358 origin in Central Asia with introgression back to Fertile Crescent populations, and we thus  
359 cautiously conclude that kabuli originated in the Turkish region.

360

361 Moroccan and Lebanese kabuli varieties appear to be highly related to both local desi and  
362 Turkish kabuli (pie plots in Figures 5c,d). The proportion of Turkish admixture in the Moroccan  
363 kabuli population (41%) is higher than in the corresponding desi populations (22%), evidence  
364 that the desi landraces spread earlier than kabuli landraces, and have had more time to diverge  
365 and accumulate their own variance. The mixed origin of Moroccan and Lebanese Kabulis was

366 also demonstrated by MixMapper, but the influence of local desi was higher than the influence  
367 of Turkish kabuli in both cases (60%) (Appendix 6). Analysis of regions admixed by Turkish  
368 kabuli in Moroccan and Lebanese kabuli chromosomes reveals common patterns (Figures 4c,d)  
369 and highlights the chromosomal regions associated with kabuli (Appendix 7). For example, the  
370 beginning of the fourth chromosome, which contains markers for chickpea flower color, the  
371 basic difference between desi and kabuli varieties (marked as triangle on the Figures 2d,e and  
372 3c,e) (Varma Penmetza et al., 2016) contains clear introgression from the Turkish kabuli  
373 ancestral population. Of note, that chromosomal region in Ethiopia appears to be derived from  
374 India (Figure 2d).

375

376

## 377 Conclusion

378

379 We have tested chickpea migration and admixture hypotheses directly, by formulating  
380 dispersal scenarios (Figures 3 and 4) based on historical evidence. We observed that the  
381 Ethiopian desi population was derived not solely from the Fertile Crescent, but almost equally  
382 from India and the Fertile Crescent (Turkey-Lebanon). Likewise, a uniform variation pattern  
383 around Mediterranean (Varshney et al., 2019) has been clarified into two likely land routes of  
384 migration from the Fertile Crescent, via Southern Europe and North Africa.

385

386 Another question which we addressed was the origin of kabuli, the light-colored chickpea type,  
387 which presumably originated from a local desi population. According to the analysis we  
388 performed this region is Turkey. We observed no evidence for kabuli's Central Asia origin and  
389 spreading back to the Fertile Crescent as was speculated previously (Varshney et al., 2019).

390

391 To test the migration and admixture hypotheses, we developed two methods. The first model  
392 is **popdisp**, which estimates allele frequencies in the population, under the assumption of a  
393 particular dispersal model within the region. We considered two reasonable physical agents of  
394 migration: traders or diffusion that approximates continuous-time stochastic process. Our  
395 assertion was that genomic resemblance between accessions can reflect either 'least-cost  
396 path' trade route distance between sample sites or linear distance between them. Our  
397 analyses unambiguously favour the former hypothesis (Figure 1a). In the future it will be  
398 interesting to apply this approach to species with different dispersal strategies, for instance  
399 comparing crops like round-seeded chickpea to human-associated weeds like spiky-podded  
400 *Medicago* capable of long-distance transport with livestock<sup>24</sup> or wind dispersed species. For  
401 the latter, we would expect distributions to track wind currents only, with no resulting  
402 signature of dispersal along historic trade routes.

403

404 The second model is **migadmi**, which estimates multiple and nested admixture hypotheses  
405 with more than two sources and demonstrates the admixture patterns along the  
406 chromosomes. Both models describe changes in allele frequencies in line with Wright-Fisher

407 drift model and utilize logit transformation as in BEDASSLE (Bradburd et al., 2013) and  
408 compositional data analysis (CoDA), the most appropriate framework for working with  
409 frequencies, fractions, percentages and ratios. This approach allows to easily extend **migadmi**  
410 to work with not only biallelic SNPs, but also with multiallelic sites or haploblocks.

411

412

413

414

## 415 **Materials and methods**

416

### 417 *Dataset*

418

419 The chickpea dataset (*Cicer arietinum* L.) consists of 421 accessions from the Vavilov Institute  
420 of Plant Genetic Resources (VIR) seed bank. These accessions were genotyped by sequencing  
421 (GBS), and 56,855 segregating single nucleotide polymorphisms (SNPs) were identified. These  
422 SNPs were further filtered to meet requirements for minor allele frequency (MAF) >3% and  
423 genotype call-rate >90%. 2,579 SNPs in 421 accessions passed all filtering criteria and were  
424 retained for further analysis (Sokolkova et al., 2020).

425

### 426 *Spatial Data and Distance Calculations*

427

428 To estimate physical distances between sample locations of chickpea accessions, we took into  
429 account the spherical model of Earth and geodesic measurements. We used the Projection  
430 Wizard web application (Šavrič et al., 2016) to select an accurate projection for regions with  
431 locations onto the two-dimensional surface (Appendix 1).

432

433 To calculate distances between pairs of locations, we used the Least-cost path model (Douglas,  
434 1994) (instead of pure geodesic measurements), the explanatory framework for the  
435 movement of goods in archeology. This approach calculates the least “cost” distance of a path,  
436 that can be interpreted as an amount of time or energy that it would have taken to travel along  
437 the path. This approach is useful in the absence of historical data on exact movement routes,  
438 and it takes into account the change in elevation, the hiking function (which is used in  
439 archeological and ethnographic applications (Gorenflo and Gale, 1990), geo-climatic Holocene  
440 data, and a mask of water bodies (see detailed description in Appendix 1).

441

442 For each of six regions (Ethiopia, Morocco, Turkey, Lebanon, India, and Uzbekistan), we  
443 estimated possible locations of chickpea diffusion centers combining current knowledge of  
444 World Centers of Diversity and historical data for locations of ancient cities that were  
445 prominent trading centers during ancient times. Using the spatial statistics tools, we calculated  
446 the mean center for each region and then compared the centers' locations with known ancient  
447 trade/cultural centers (Ancient World Mapping Center. University of North Carolina, Chapel  
448 Hill, [http://awmc.unc.edu/awmc/map\\_data/shapefiles/strabo\\_data/](http://awmc.unc.edu/awmc/map_data/shapefiles/strabo_data/)). As a result, we selected  
449 the following historic settlements closest to the mean centers: Axum (Ethiopia), Volubilis  
450 (Morocco), Diyarbakir (Turkey), Heliopolis (Lebanon), Ayodhya (India), and Marakanda  
451 (Uzbekistan).

452

453

454 *Model for diversification within clusters*

455 The model describing populations dispersals is implemented in Python package **popdisp**  
456 (<https://github.com/iganna/popdisp>).

457

458 *Model*

459

460 We developed popdisp, a Bayesian hierarchical model (Figure 2a) that describes historical  
461 diversification of chickpea populations within a geographical region. We hypothesize that each  
462 geographic region contains  $M$  populations originated from one center (ancestral population)  
463 and spread towards  $M$  locations. Each population is composed of individuals genotyped for  $N$   
464 unlinked (independent) biallelic SNPs; the missing data is possible and does not require the  
465 imputation. We pooled the data from all individuals in a population; for  $j$ -th population and  $i$ -  
466 th SNP, we defined the total counts of non-reference (alternative) allele –  $y_j^i$  – and the total  
467 count of all variants at this SNP –  $n_j^i$ . Values  $n_j^i$  are not the same across all SNPs in  $j$ -th  
468 population due to the missing data. We assume that frequency of the alternative allele for  $i$ -  
469 th SNP in  $j$ -th population is  $f_j^i$ , and the observed  $y_j^i$  follows the Binomial distribution:  $y_j^i \sim$   
470  $Bin(f_j^i, n_j^i)$ .

471

472 Within a region, we modelled population spread along a given binary-branching path from the  
473 ancestral population, which is characterized by respective frequency  $f_A^i$ . We assumed that  
474 population allele frequencies change under the genetic drift in line with the Wright-Fisher  
475 model and theory of Compositional Data analysis (CoDA). The CoDA theory states that  
476 frequencies (as well as percentages or fractions) are meaningless when considered alone, as  
477 they sum up to one, hence, the only balances between frequencies do make sense. According  
478 to the CoDA, we applied the isometric log-ratio (ilr) transformation to allele frequencies, and,  
479 in case of biallelic SNPs, it is the logit transformation as used in BEDASSLE (Bradburd et al.,  
480 2013):

481

$$482 \quad x_j^i = \log \frac{1 - f_j^i}{f_j^i}; f_j^i = \frac{1}{1 + \exp(x_j^i)}.$$

483

484 New variable  $x_j^i$  means the log-balance between frequencies of reference and alternative  
485 alleles, and is not bounded, i.e., can take values in  $(-\infty, +\infty)$ . The latter allows us to model  
486 correlations between population frequencies using Multivariate normal distributions without  
487 artificial truncation, which is necessary when the model operates with non-transformed  
488 frequencies(Gautier, 2015).

489

490 To describe the genetic drift of allele frequencies along the binary-branching paths, we  
491 modified the approach proposed in TreeMix(Pickrell and Pritchard, 2012) and BayPass(Gautier,  
492 2015). In the Wright Fisher model, the expected value and variance of allele frequency in  $j$ -th

493 population are  $E[f_j^i] = f_A^i$ ,  $var[f_j^i] \approx f_A^i(1 - f_A^i)t$ , where  $t$  is the amount of genetic drift,  
494 which has occurred along the path from the ancestral population to  $j$ -th population. To match  
495 these first two moments after ilr-transformation of allele frequencies (Appendix 2), the  
496 following should be satisfied:  $E[x_j^i] = x_A^i$ ,  $var[x_j^i] = \frac{t}{f_A^i(1-f_A^i)}$ .

497  
498 Using the logic of model construction from TreeMix(Pickrell and Pritchard, 2012) and Gaussian  
499 model for changing log-balances, we get that  $x_j^i \sim \mathcal{N}\left(x_A^i, \frac{t}{f_A^i(1-f_A^i)}\right)$ , where  $t$  is proportional to  
500 the cumulative path from the ancestral population to  $j$ -th population. Using the Felsenstein's  
501 approach (Felsenstein, 1973), we model the change of log-balances along the binary-branching  
502 path with Multivariate normal distribution:

$$\vec{x}^i \sim Mv\mathcal{N}\left(\vec{x}_A^i, \frac{V}{s^i \cdot f_A^i(1 - f_A^i)}\right), \quad (1)$$

504  
505 where  $\vec{x}^i = (x_1^i, x_2^i, \dots, x_M^i)$ ,  $s^i$  is the constant of proportionality specific for  $i$ -th SNP,  $V$  is  
506  $M \times M$  matrix, which reflects the covariance structure between  $M$  population based on the  
507 binary-branching path. This path can be represented as a binary tree structure with ancestral  
508 population at the root and  $M$  leaves (Figure 2b). On the diagonal, matrix  $V$  contains cumulative  
509 branch lengths from the tree root to respective leaves, and the off-diagonal elements are equal  
510 to sum of common branches for respective pair of populations(Felsenstein, 1973). We  
511 compute values in  $V$  matrix based on known length of binary-branching path and scale it, so  
512 that the mean value of diagonal elements should equal to one.

513  
514 *Prior probabilities and MCMC*

515  
516 For each SNP, model has the following parameters: the allele frequency in the ancestral  
517 population, log-balances of allele frequencies for  $M$  populations, and the constant of  
518 proportionality. To get estimates, we constructed Bayesian model with the following prior  
519 distributions for parameters.

520  
521 For  $f_A^i$ , we proposed uninformative beta prior,  $Beta(a^i, b^i)$ , with uniform prior for the mean,  
522  $\frac{a^i}{a^i+b^i} \sim Unif(0,1)$ , and exponential prior for the so-called "sample size",  $a^i + b^i \sim Exp(1)$ .  
523 We also assume the exponential prior for constant of proportionality:  $s^i \sim Exp(1)$ .

524  
525 The complexity of the model does not allow the use of Gibbs Sampling. Instead, we performed  
526 the algebraic inference of derivatives for log posterior distribution and run Hamiltonian Monte  
527 Carlo sampling algorithm (Neal, 2012) in pyhmc (<https://pythonhosted.org/pyhmc/>) to get  
528 parameter estimates. For each chickpea subpopulation we ran 3 MCMC chains of length  
529 50,000 and traced the Gelman-Rubin convergence diagnostic (<1.1) and effective sample size.



530

531 To conclude which model of chickpea dispersal within a region is more probable, we separately  
532 got estimates on  $V$  matrix calculated for trade routes and linear distances. Then we compared  
533 log posterior values between two estimates (Supplementary File 6).

534

535 *Model for migration between clusters*

536

537 The migadmi model describing **migrations** and **admixture**s of populations is implemented in  
538 Python package **migadmi** (<https://github.com/iganna/migadmi>).

539

540 To test hypothetical migration routes of chickpea between regions, we created a model based  
541 on the same assumptions as used in the model for population spread within a region. We  
542 consider  $P$  populations characterised with vectors of log-balances of allele frequencies, which  
543 are obtained from the previous analysis. We denote log-balances of allele frequencies of  $i$ -th  
544 SNP in  $j$ -th populations with  $x_j^i$ .

545

546 A migration hypothesis is set by the binary tree, which branch lengths are parameters. Based  
547 on the migration hypothesis, we construct the parametrized covariance matrix  $V$  and matrix  $D$   
548 containing variances of differences between log-balances:  $D_{jk} = V_{jj} + V_{kk} - 2V_{jk}$ . Then, we  
549 can construct the following likelihood function (Appendix 3):

550

$$\mathcal{L}(X|D) = \prod_{i=1}^N \prod_{j=1}^{P-1} \prod_{k=j+1}^P p_{\mathcal{N}}(x_j^i - x_k^i | 0, c^i D_{jk}), \quad (2)$$

551

552 where  $N$  is a number of SNPs,  $X$  is the matrix of log-balances for all SNPs and all populations,  
553  $c^i$  is a SNP-specific scale parameter.

554

555 The likelihood (2) contains a unique scale parameter,  $c^i$ , for each SNPs, making the model  
556 overparametrized. To reduce the number of parameters, we applied the sliding window  
557 technique. We divided each chromosome into overlapping windows of the same size almost  
558 equal to the LD,  $3 \cdot 10^6$  bp; the step parameter in the sliding window was  $1 \cdot 10^6$ . As the  
559 density of SNPs along chromosomes is not uniform (Supplementary File 5), windows contained  
560 different numbers of SNPs; those with less than 10 SNPs were filtered out.

561

562 We assumed that SNPs within each window are probably linked and had evolved with a similar  
563 rate. This assumption allows us to avoid  $c^i$  parameters (set it to 1), and infer objective function  
564 proportional to log-likelihood (see Appendix 4):

565

$$f(D, w) \propto \sum_{j=1}^{P-1} \sum_{k=j+1}^P \log p_{\mathcal{N}}(d_w(x, j, k) | 0, D_{jk}), \quad (3)$$

566

567 where  $d_w(x, j, k)$  is a root mean square distance between  $j$ -th and  $k$ -th populations,  
568 computed on SNPs from  $w$ -th window (see Appendix 4),  $\log p_{\mathcal{N}}$  denotes the log-density of  
569 normal distribution. We estimate parameters in  $D$  matrix separately for each window.

570

571 *Modeling admixture events*

572

573 We developed a new model of admixtures which considers that (i) admixture events happened  
574 long ago and all populations (both source and mixed) accumulated their own variance after  
575 the event, (ii) number of source populations in one event are not constrained, i.e., can be  
576 higher than 2, (iii) several admixture events can be analyzed simultaneously, and (iv)  
577 admixtures can form a hierarchy, i.e., a mixed population in one admixture event can be a  
578 source in another event.

579

580 Let population  $y$  be a mixture of  $Q$  sources ( $z_q, q = \overline{1, Q}$ ), which are precursors of  $Q$  current  
581 populations ( $x_q, q = \overline{1, Q}$ ). We parametrized this admixture event with the following variables:  
582  $t_y$  – own variance of the mixed population;  $w_q$  – weights of source populations,  $\sum_{q=1}^Q w_q = 1$ ;  
583  $\alpha \in [0,1]$  – part of own variance of  $x_q$  which is common with  $z_q$  (see Appendix 5). To avoid  
584 overparameterization, we set the regularization on  $w_q$  with the Dirichlet prior (all  
585 concentration parameters,  $\lambda$ , equal to 0.9).

586

587 To test an admixture hypothesis, we (i) constructed the corresponding tree with admixture  
588 events, (ii) parametrized  $V$  and  $D$  matrices based on the tree, (iii) estimated parameters  
589 maximizing the objective function (4).

590

591

$$f(D, w) \propto \sum_{j=1}^{P-1} \sum_{k=j+1}^P \log p_{\mathcal{N}}(d_w(x, j, k) | 0, D_{jk}) + (\lambda - 1) \sum_{q=1}^Q \log w_q, \quad (4)$$

592

593

## 594 *Appendix 1. Geographic distances between locations*

595

### 596 *Projection*

597 The map projection used to represent a geographic region on a flat surface plays a critical role  
598 when measuring distances (such as distances between regions), areas or assessing shape or  
599 direction. Whenever a spherical model of Earth is projected onto two-dimensional surface,  
600 distortions of one or another kind are introduced, altering these variables to a different degree.  
601 Our project area stretches from the Iberian Peninsula through the Mediterranean Ocean,  
602 swinging south to Ethiopia and further covering parts of Central Asia, to the West India, laying  
603 below 60 degrees North to the Equator. That spatial extent and the ultimate focus on  
604 extracting physical distances, called for Equidistant Conic Secant projection, which is  
605 characterized by having two standard parallels (as opposed to Tangent projections that have  
606 only one standard parallel). This projection has proved practical since Classical times (Snyder,  
607 1993). We used the Projection Wizard web application (Šavrič et al., 2016) to select accurate  
608 angular and linear parameters for the transformation.

609

### 610 *Calculation of Distances*

611 It is typical to use geodesic measurements of distance between pairs of points in landscape  
612 genomics (Abebe et al., 2015) and although these can yield adequate results, they do not take  
613 full advantage of genomic data to provide insights into historical patterns of trade and  
614 diffusion. Least-cost path models (Douglas, 1994) have emerged as an explanatory framework  
615 for movement of goods in archeology (Kantner, 1997). This approach of calculating the  
616 distance of a path with the least “cost” (interpreted usually as change in elevation) provides a  
617 mechanism, in the absence of historical data on exact movement routes, to estimate the time  
618 and energy that it would have taken to travel from location to location. Pairwise distances  
619 between concentrations of accessions were calculated both using geodesics as is typical in  
620 landscape genomics (Abebe et al., 2015) and as least-cost paths with slope and water bodies  
621 defining landscape friction, following a trend to use three-dimensional spatial modeling to  
622 predict trade routes between ancient settlements (Herzog, 2014; van Lanen et al., 2015). We  
623 used the hiking function, which has been used in archaeological and ethnographic applications  
624 (Gorenflo and Gale, 1990) to assign resistance along with a cost surface accounting for climatic  
625 conditions.

626

627 We created a cost surface using selected geo-climatic Holocene data sets, mask of water  
628 bodies, and weighted elevation gradient, rescaled to a common scale. We used the following  
629 climatic layers: maximum temperature of the warmest month, minimum temperature of the  
630 coldest month and precipitation of wettest month for past conditions (Mid-Holocene),  
631 obtained from WorldClim, Version 1.4 database, MIROC-ESM GCM (Hijmans et al., 2005).  
632 Temperature and Precipitation ranges were ranked in accordance with ASHRAE Thermal  
633 Comfort chart (Hoyt et al., 2013).

634

635 A slope layer was created from the world elevation (GTOPO30) and reclassified according to  
636 the Tobler function (Tobler, 1993). In addition, a water mask was created to mask out water  
637 bodies. We then used Weighted Overlay tool of ArcGIS to create a cost surface layer, where  
638 each pixel had a value of the least accumulative cost distance from or to a source of interest.  
639 Supplementary File 7 describes scheme of classification for each layer and its relative weight  
640 in building cost surface.

641

642 One hypothesis is that movement between sites always goes through historical centers of  
643 trade before dispersing out to rural villages. In this exploratory analysis we converted least-  
644 cost paths between mean centers that could have served as the foci of crop dispersion, using  
645 data acquired from the Ancient World Mapping Center, UNC GIS, into vector format and  
646 construct a road network for the whole area.

647

648 The cost distance layer was further used to prototype paths between cities (regional centers  
649 of dispersion) as well as within each cluster. The resultant least-cost path rasters were  
650 converted to vector format, cleaned of duplicates and served as base data for building a road  
651 network. We then employed ArcGIS Network Analyst functionality to build a road network that  
652 encountered for terrain relief and point connectivity, and to retrieve distance values between  
653 and within spatial clusters. Straight-line geodesic distances were calculated with the ESRI  
654 ArcGIS Near tool.

655

#### 656 *Selection of Centers of Diversification*

657 We estimated the number and locations for hypothetical centers of diffusion by combining  
658 current knowledge of regions that served as World Centers of Diversity (Corinto, 2014), cluster  
659 analysis of our accessions' locations, and historical data for locations of ancient cities that were  
660 prominent trading centers during ancient times (Ancient World Mapping Center, n.d.).

661 We applied ArcGIS clustering analysis and spatial statistics tools to group all accessions into six  
662 clusters based on geographic locations and spatial constraints, and to calculate mean center  
663 for each cluster. We then compared the locations of the mean centers with known ancient  
664 trade / cultural centers (Ancient World Mapping Center, n.d.) and selected a historic  
665 settlement closest to each calculated mean center: Axum (Ethiopia), Volubilis (Morocco),  
666 Diyarbakir (Turkey), Heliopolis (Lebanon), Ayodhya (India), and Marakanda (Uzbekistan)

667

668

669

670 *Appendix 2. First two moments of ilr-transformed allele frequencies.*

671

672 Let a population be described by the frequency of alternative allele of a biallelic SNP,  $f$ . The  
673 population comes out from the ancestral one with the allele frequency  $f_A$  under the Wright  
674 Fisher model of genetic drift. In the Wright Fisher model, expected value and variance of allele  
675 frequency are  $E[f] = f_A$ ,  $var[f] = f_A(1 - f_A) \left(1 - \left(1 - \frac{1}{2N}\right)^\tau\right)$ , where  $\tau$  is the number of  
676 generations separating current and ancestral populations, and  $N$  is the size of diploid  
677 population. Using the Binomial approximation,  $var[f] \approx f_A(1 - f_A) \frac{\tau}{2N} = f_A(1 - f_A)t$ , where  
678  $t$  can be considered as the amount of genetic drift.

679

680 We applied the ilr-transformation for allele frequencies and obtained  $x = \log \frac{1-f}{f}$ ,  $x_A =$   
681  $\log \frac{1-f_A}{f_A}$ . These new variables mean the log-balance between reference and alternative allele  
682 frequencies in the current and ancestral populations. Using Taylor expansions, the second  
683 order approximation of the expected value of  $x$  is  $x_A$ , and the approximation of variance is the  
684 following:

685 
$$var[x] = \left(\frac{d}{df_A} \left(\log \frac{1-f_A}{f_A}\right)\right)^2 \cdot var[f] = \left(\frac{1}{1-f_A} - \frac{1}{f_A}\right)^2 f_A(1 - f_A)t = \frac{t}{f_A(1-f_A)}.$$

686

687 **Appendix 3. Estimates for branch parameters of a tree**

688

689 Let's consider  $P$  populations originated from one ancestral state and a binary tree depicting  
 690 their migration history; all tree branch lengths are parameters. Each population is  
 691 characterized by log-balance of allele frequencies for a SNP,  $x_i$ . In the model for population  
 692 spread within a region, it has been assumed that  $\vec{x} \sim Mv\mathcal{N}\left(\vec{x}_A, \frac{V}{s \cdot f_A(1-f_A)}\right)$ , where  $\vec{x} =$   
 693  $(x_1, x_2, \dots, x_P)$ ,  $x_A$  is the log-balance of allele frequency in the root of the tree (ancestral state).  
 694 However, in testing historical hypotheses, there is no given information about the ancestral  
 695 state:  $f_A$  is not known, position of the root in the binary tree is parametrized. Therefore, it is  
 696 impractical to include  $f_A$  into the model and use the above-mentioned multivariate normal  
 697 distribution.

698

699 To avoid the use of  $f_A$ , we propose an approach which considers total variance between  
 700 populations instead of covariance. Let covariance matrix between populations,  $V$  be obtained  
 701 based on the fully parametrized binary tree according to Felsenstein's method(Felsenstein,  
 702 1973) (see Example on Figure A1). Then, we can obtain a matrix  $D$ , which elements are  
 703 proportional to variances of the difference between log-balances:

704

$$\text{var}(x_i - x_j) \propto D_{ij} = V_{ii} + V_{jj} - 2V_{ij}.$$

706

707 Based on Gaussian changing log-balances, we get:  $(x_i - x_j) \sim \mathcal{N}(0, c \cdot D_{ij})$ , where  $c$  is a  
 708 constant of proportionality covering  $\frac{1}{s \cdot f_A(1-f_A)}$ .

709

710 To get maximum likelihood estimates of the tree branch length based one SNP, the following  
 711 likelihood function can be written:

712

$$\mathcal{L} = \prod_{i=1}^{P-1} \prod_{j=i+1}^P p_{\mathcal{N}}(x_i - x_j | 0, cD_{ij}).$$

713

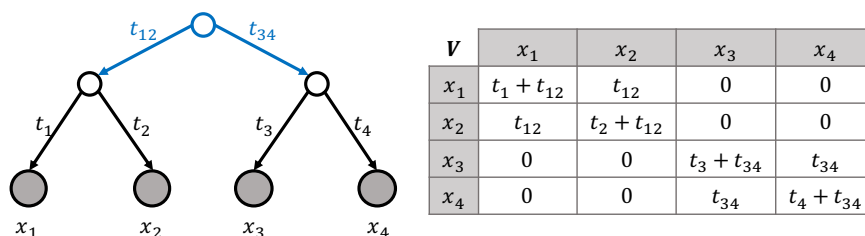

714

715 **Figure A1.** Example of constructing matrix  $V$  based on the tree with parametrized branches.

716

717

718 *Appendix 4. Inference of likelihood function for a set of linked SNPs*

719

720 A “window” is a segment on a chromosome of length equal to a predefined value ( $\approx$ LD) that  
 721 contains a subset of SNPs. We assumed, that, within each window, SNPs are probably linked  
 722 and they had evolved with a similar rate. Let  $G_w$  be a set (group) of SNPs corresponding to  $w$ -  
 723 th window, and  $s^w$  be a scale, specific for this window and reflecting the rate. For  $i$ -th SNP in  
 724  $j$ -th population, we denote log-balances of allele frequency with  $x_j^i$ . Then, the Likelihood  
 725 function for log-balances of allele frequencies in the  $w$ -th window is:

726

$$727 \quad \mathcal{L}(X|D, w) = \log \left( \prod_{i \in G_w} \prod_{j=1}^{P-1} \prod_{k=j+1}^P p_{\mathcal{N}} \left( x_j^i - x_k^i \middle| 0, \frac{D_{jk}}{s^w f_A^i (1 - f_A^i)} \right) \right).$$

728

729 where  $f_A^i$  is the allele frequency of the ancestral state. This value is not a parameter, is not  
 730 known, and plays the scale role. In line with CoDA, we estimate it as  $\hat{f}_A^i = 1/(1 +$   
 731  $\exp(\text{mean}_j x_j^i))$ . Let denote constant  $q_i^2 = \hat{f}_A^i (1 - \hat{f}_A^i)$ , then the likelihood is proportional to:

732

$$733 \quad \mathcal{L}(X|D, w) \propto \prod_{i \in G_w} \prod_{j=1}^{P-1} \prod_{k=j+1}^P \frac{1}{\sqrt{2\pi D_{jk}/s^w}} \exp \left( -\frac{((x_j^i - x_k^i)/q_i)^2}{D_{jk}/s^w} \right) =$$

$$734 \quad \prod_{j=1}^{P-1} \prod_{k=j+1}^P \frac{1}{(2\pi D_{jk}/s^w)^{\frac{|G_w|}{2}}} \exp \left( -\frac{\sum_{i \in G_w} ((x_j^i - x_k^i)/q_i)^2}{D_{jk}/s^w} \right) =$$

$$735 \quad \prod_{j=1}^{P-1} \prod_{k=j+1}^P \left[ \frac{1}{(2\pi D_{jk}/s^w)^{\frac{1}{2}}} \exp \left( -\frac{\frac{1}{|G_w|} \sum_{i \in G_w} ((x_j^i - x_k^i)/q_i)^2}{D_{jk}/s^w} \right) \right]^{|G_w|} =$$

$$736 \quad \left[ \prod_{j=1}^{P-1} \prod_{k=j+1}^P p_{\mathcal{N}}(d_w(x, j, k) \middle| 0, D_{jk}/s^w) \right]^{|G_w|},$$

737

738 where  $d_w(x, j, k) = \sqrt{\frac{\sum_{i \in G_w} ((x_j^i - x_k^i)/q_i)^2}{|G_w|}}$  is the normalized root mean square distance between

739  $j$ -th and  $k$ -th populations, computed on SNPs from  $w$ -th window. However, as matrix  $D$  is fully  
 740 parametrized, we can set  $s^w = 1$  without loss of generality. To get parameters estimated, we  
 741 can remove the power and maximize the following log-likelihood function:

$$742 \quad \log \mathcal{L}(X|D, w) \propto \sum_{j=1}^{P-1} \sum_{k=j+1}^P \log p_{\mathcal{N}}(d_w(x, j, k) \middle| 0, D_{jk}).$$

743

744



745 *Appendix 5. Identification of parameters in the mixture model*

746 Consider six populations originated from one ancestral state, and a tree depicting the history  
747 of the populations (Figure A2a);  $x_j$  is a normal random variable reflecting the log-balance of  
748 frequencies for the SNP in population  $j$  (Figure A2a). We denote lengths of tree branches with  
749  $t_i$ .

750 Let the seventh population (having  $y$  log-balance of frequencies for the SNP) originate by a  
751 mixture event of three populations (precursors of  $x_1$ ,  $x_3$ , and  $x_6$ ), and then evolve  
752 independently along the branch with the length  $t_y$  (Figure A2b). We assume that the mixture  
753 event happened long ago, so that current populations  $x_i$  have their own evolutionary history,  
754 independent from the sources  $z_i$ . To carefully consider the mixture event, we introduced  
755 weight parameters  $w_i$ ,  $\alpha_i$ ,  $\beta_i$ , as demonstrated in Figure A2b,e. In our example, the number of  
756 additional parameters is 10, and the number of constraints is 4; hence, the number of free  
757 parameters is 6. The number of cells in the matrix  $D$ , which contain additional parameters, is  
758 6, so all free parameters are identifiable in this example. However, in the extreme situation,  
759 when all six initial populations can be considered as sources of the mixed one, the number of  
760 free parameters reaches 12, and some of them become non-identifiable.

761 In general, when the initial tree connects  $n_{pop}$  populations and all of them can be sources of a  
762 mixed one, the number of free parameters is  $2n_{pop}$  and number of cells in the matrix  $D$ , which  
763 contain additional parameters, is  $n_{pop}$ . Therefore, to avoid this overparameterization we  
764 introduce several constraints. First, we assume that all  $\alpha_i$  are equal to each other, and this  
765 assumption reduce the number of free parameters to  $(n_{pop} + 1)$  (Figure A2c). Second, we set  
766 the regularization on  $w_i$  weights using the Dirichlet prior with all concentration parameters  
767 equal to 0.9:  $(w_1, \dots, w_{n_{pop}}) \sim \text{Dirichlet}(0.9 \dots 0.9)$ . Imitating absorbing states in the genetic  
768 drift, this prior tends to pull some weights to zeros, i.e. to put  $(w_1, \dots, w_{n_{pop}})$  vector closer to  
769 the border of  $n_{pop}$ -dimensional simplex. These two introduced restrictions make all free  
770 parameters in the model identifiable.

771

772

773

774

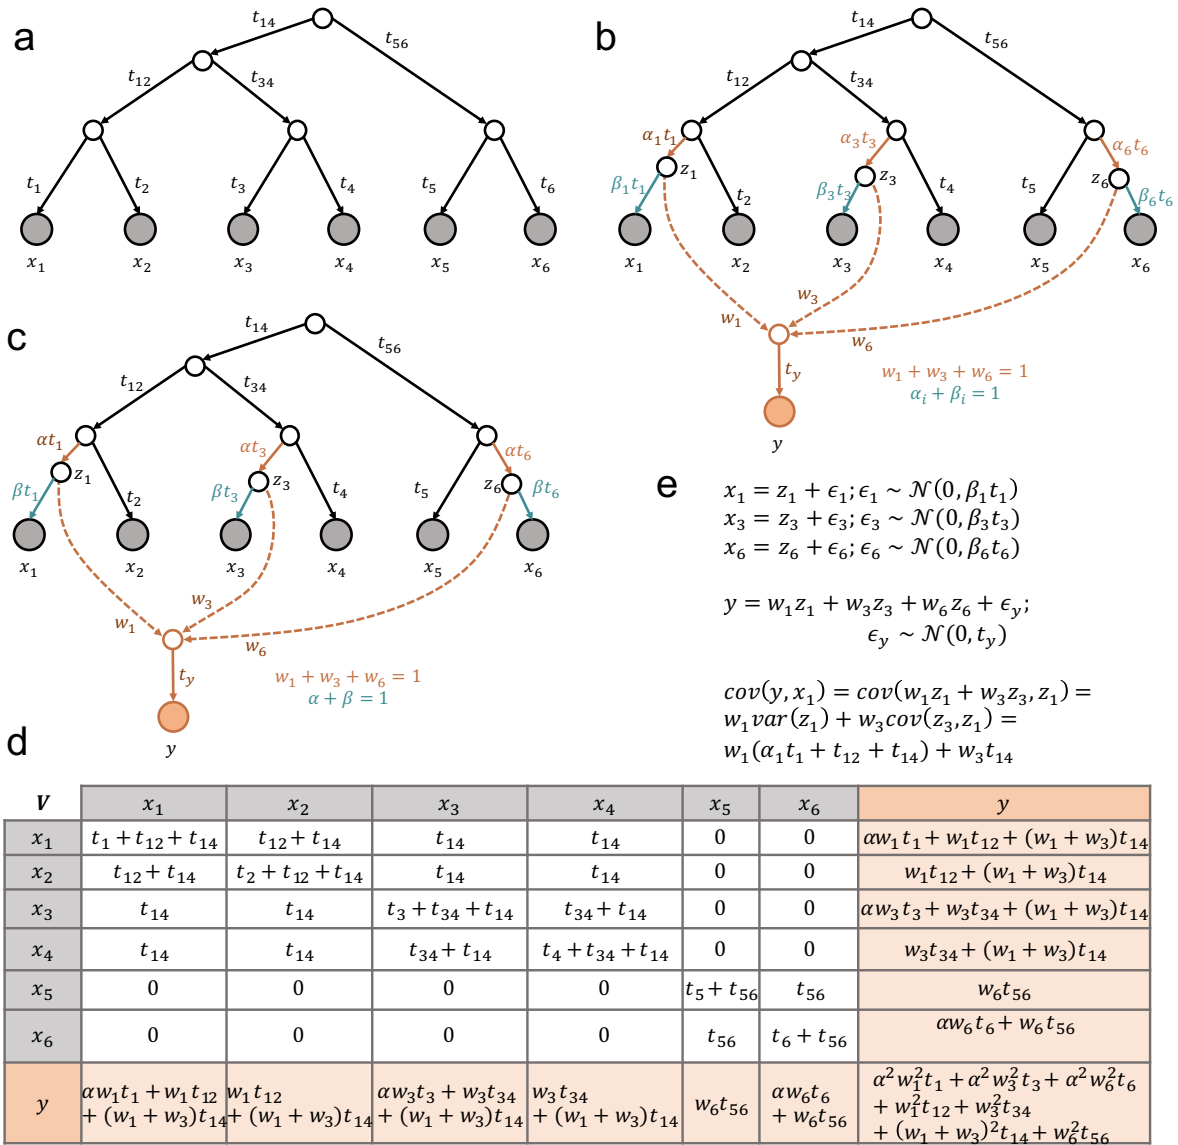

775

776 **Figure A2.** An example tree describing the evolutionary history of 7 populations with  
 777 admixture;  $x_i$  represent the frequency balance of a SNP for  $i$ -th population,  $y$  is the population  
 778 formed with an admixture,  $t_i$  are the length of a tree branch,  $w_i$ ,  $\alpha_i$ , and  $\beta_i$  are a weight  
 779 parameters. The  $V$ -table demonstrates the variance-covariance matrix  $V$  for all populations  
 780 after re-parametrization.

781

782 *Appendix 6. Comparison of migadmi results with TreeMix and MixMapper*

783

784 **Table A1.** Comparison of admixture methods

|                                                                                          | migadmi                     | TreeMix              | MixMapper            |
|------------------------------------------------------------------------------------------|-----------------------------|----------------------|----------------------|
| Admixture of >2 sources                                                                  | +                           | -                    | -                    |
| Several non-nested admixtures                                                            | +                           | +                    | -                    |
| Number of nested admixtures                                                              | $\geq 2$                    | 0                    | 2                    |
| Adding admixture event to core tree                                                      | +                           | -                    | +                    |
| Admixture pattern along the chromosome                                                   | +                           | -                    | -                    |
| Can take the tree as input                                                               | +                           | +                    | -                    |
| Accounting for own evolutionary history for both mixed population and source populations | +                           | -                    | -                    |
| Modeling frequencies                                                                     | Compositional data analysis | Normality assumption | Normality assumption |

785

786

787 To estimate the migration and admixture events in our study, we developed a new method,  
 788 **migadmi**, because of the limitations of the existing ones, TreeMix (Pickrell and Pritchard, 2012)  
 789 and MixMapper (Lipson et al., 2013). We created a list of characteristics to compare the  
 790 packages and found that our method covers and outperforms capabilities of TreeMix and  
 791 MixMapper: our package copes with estimating multiple complex admixture events with more  
 792 than 2 sources and demonstrates the admixture patterns along the chromosomes. Moreover,  
 793 it has two additional features that were not accounted for in previous models.

794

795 The first feature is that, **migadmi** allows populations to get their own variance after admixture  
 796 events. In the existing approaches, it is assumed that the composite population is a weighted  
 797 sum of some source populations, and weights sum to 1. However, in reality, almost no  
 798 population is settled as a net sum of two or more. Ordinarily, when a part of one population  
 799 appears in a new place, it evolves some period of time getting its own variability, and then if  
 800 the admixture event happens, the mixed population continues to evolve. As a result, the  
 801 variance in the admixed population can be factored into contributions from source populations  
 802 and self-accumulated variance. The latter is especially important if the admixture events  
 803 happened long ago (e.g., as in our study). Things get more complicated when considering that  
 804 source populations have also evolved. To avoid modeling the mixed populations as a weighted

805 sum of source ones, we parametrized the own variance of each population after the admixture  
806 event.

807  
808 The second important feature of **migadmi** is the use of ilr-transformed allele frequency instead  
809 of allele frequency itself. Allele frequencies, as fractions or percentages, are constrained (i.e.  
810 sum up to 1 or 100%), which makes standard statistical methods inapplicable. For example,  
811 frequencies cannot be modelled as normally distributed random variables, as the domain of  
812 the normal distribution is  $(-\infty, +\infty)$ , not  $[0, 1]$ . Another problem is presence of negative bias  
813 in covariance estimates between frequencies (Aitchison, 1986). Moreover, frequency of one  
814 allele is inextricably linked with frequencies of others as they sum to 1. Therefore, modeling  
815 frequency changes of one allele cannot be considered without modeling changes in other  
816 alleles. To correctly work with frequencies, the theory of compositional data analysis and  
817 Aitchison geometry were first established in the end of previous century (Aitchison,  
818 1986)(Pawlowsky-Glahn and Buccianti, 2011). Following this theory, one can independently  
819 analyze  $(D - 1)$  balances between frequencies, instead of  $D$  frequencies. In case of biallelic  
820 SNPs, the balance is the logarithm of the ratio between reference and alternative alleles, and  
821 this balance takes values in  $(-\infty, +\infty)$ . We adapted the use of balances to model changes of  
822 allele frequencies in line with the Wright-Fisher drift model. The balance-based approach was  
823 used in both **popdisp** and **migadmi** models.

824  
825 The direct comparison of migadmi results with TreeMix and MixMapper results is not possible  
826 because we used migadmi to estimate complex admixture graphs, which TreeMix and  
827 MixMapper cannot cope with (Table A1). However, we performed the standard TreeMix and  
828 MixMapper analyses and traced the common and different trends in results.

829  
830 First, we applied TreeMix and set to estimate 4 events within 10 populations. We used TreeMix  
831 in two modes: without tree root specification and with specification of Ethiopia desi population  
832 as a root, the most distinct one (Figure A3). We also used the bootstrap with the size of 35,  
833 that equals to the mean number of SNPs in our sliding window technique. Both obtained  
834 admixture graphs demonstrated two expectable distant clades in trees: Uzbekistan-India and  
835 Turkey-Lebanon-Morocco. However, the obtained trees also contained deviations from the  
836 expectations. In the root-specified tree, the Ethiopian desi population is the source for Turkish  
837 desi that contradicts the conventional story of chickpea spread (Figure A3a). The root-  
838 unspecified tree contains India's influence on Moroccan desi, which is also unlikely, because  
839 these populations are the most distant to each other (Figure A3b).

840  
841 On the other hand, TreeMix graphs partly support the hypothetical origin of Ethiopian and  
842 Moroccan desis. The location of Ethiopian desi on the root-unspecified tree demonstrated its  
843 sources from both main clades, which is in line with the mixed origin of this population. In the

844 root-unspecified tree, the Moroccan desi population is located between Turkish and Lebanese  
845 populations, while in the root-specified tree, it locates close to Turkey with an admixture from  
846 Lebanese desi. Therefore, we may conclude that Moroccan desi is an indirect mixture of  
847 Turkish desi and Lebanese desi.

848 The origin of kabulis is impossible to infer from this tree, however, the root-specified tree  
849 indicates that the Uzbeki kabuli has an admixture from the Turkey-Morocco clade, that is in  
850 line with our hypothesis, that Uzbeki kabuli is not the source of other kabulis.

851

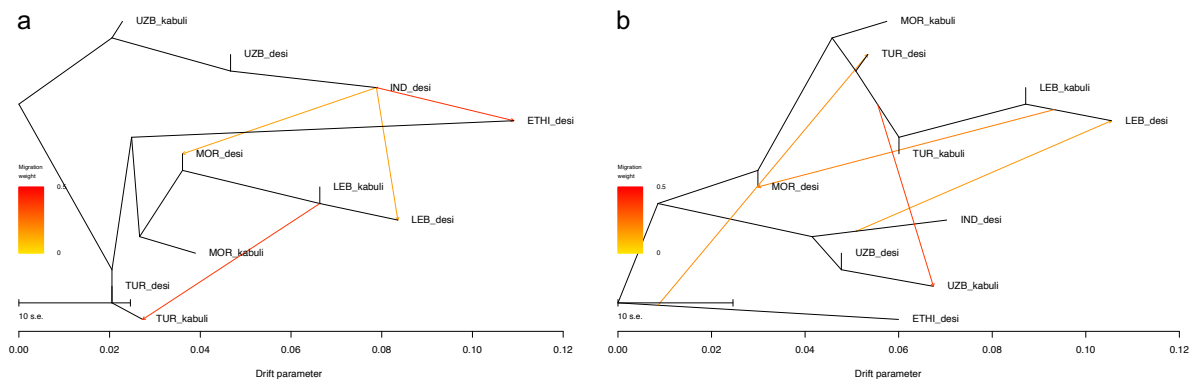

852

853 **Figure A3.** Admixture graphs obtained with the TreeMix package for (a) unrooted tree and (b)  
854 rooted with the Ethiopian desi population. Firstly, TreeMix estimates the tree based on all input  
855 populations (black branches), and then it introduces admixture events (colored arrows). Color  
856 of lines reflects the weight of the admixture from 0 to 0.5.

857

858 MixMapper takes source populations as input, then creates a tree on them and tests a mixed  
859 population adding it to the tree. We applied MixMapper in the bootstrap mode to match  
860 windows from our analysis. We analyzed the origin of Ethiopian desi, taking Turkish, Lebanese,  
861 Indian, Uzbeki desis as source populations. MixMapper revealed two sources of Ethiopian desi:  
862 Turkish desi (60%) and Indian desi (40%). The direct analysis of Moroccan desi as a mixture  
863 from Turkish, Lebanese, Indian, Uzbeki desis revealed that it is as a mixture from Lebanese desi  
864 (98%) and Indian desi (2%).

865 To test the origin of kabuli, we tested two models and compared the admixture coefficients.  
866 In the first model, we assumed that Turkish, Lebanese, Indian, Uzbeki desis, and Turkish kabuli  
867 are five source populations, and Uzbeki kabuli is a mixture. The direct analysis revealed that  
868 Uzbeki kabuli has 62% from Uzbeki desi and 38% from Turkish kabuli. In the second model, we  
869 assumed that Turkish, Lebanese, Indian, Uzbeki desis, and Uzbeki kabuli are five source  
870 populations, and Turkish kabuli is a mixture. In this case, we found that Turkish kabuli is a  
871 mixture of Turkish desi and Lebanese kabuli, so that not from Uzbeki kabuli. Therefore, we may  
872 conclude that origin of kabuli is likely Turkey.

873 Then, we took Turkish, Lebanese, Indian, Uzbeki desis, and Uzbeki kabuli and tested them as  
874 sources for Lebanese kabuli and Moroccan kabuli separately. Lebanese kabuli is predicted to

875 be a mixture local desi (60,2%) and Turkish kabuli (30,8%). The Moroccan kabuli was tested in  
876 the nested model (as Moroccan desi is also the mixture), which revealed Moroccan kabuli as a  
877 mixture of Moroccan desi (60,3%) and Turkish kabul (39,7%).

878

879 *Appendix 7. Chromosomal regions associated with kabuli/desi difference*

880

881 The most pronounced difference between desi and kabuli chickpea types is the flower color.  
882 In legumes, this trait is Mendelian and controlled by the so-called A gene (Hellens et al., 2010).  
883 For *Pisum sativum* and *Medicago truncatula*, the sequences of this gene can be found at  
884 GenBank accessions: GU132940 (MtbHLH) and GU132941 (PsbHLH). We took these  
885 sequences, performed the tBLASTn search against *Cicer arietinum* genes, and found the  
886 match with basic helix-loop-helix protein A located at LOC101506726 locus (2149255-  
887 2158629bp, the beginning of chromosome 4).

888 To verify that this region is associated with desi/kabuli difference, we performed GWAS  
889 analysis on the binary trait (belonging to desi or kabuli) using rrBLUP. We found one significant  
890 SNP which is located very close to the found homologous LOC101506726 locus. Therefore, we  
891 suppose that this locus can be considered as a marker locus for kabuli.

892

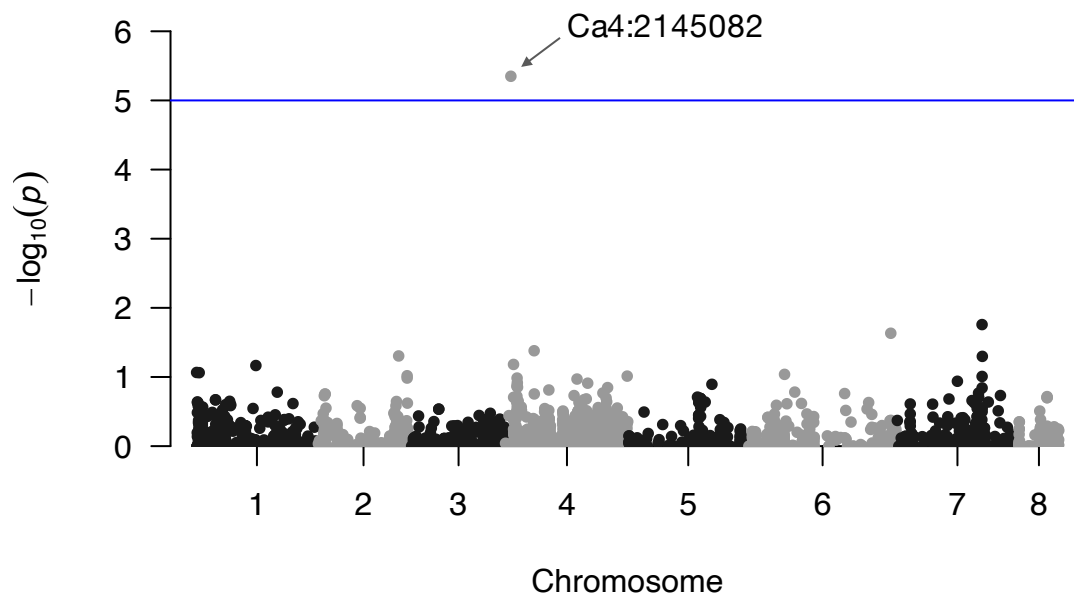

893

894 **Figure A4.** Manhattan plot for GWAS of desi/kabuli binary trait.

895

896

897

## 898 Data Availability

899

900 All Illumina data are available from the National Center for Biotechnology database under  
901 BioProject PRJNA388691. Processed initial data for the analysis is uploaded to GitHub  
902 repositories with the code.

903

## 904 Code Availability

905

906 Code for the popdisp and migadmi analysis frameworks are available at:  
907 <https://github.com/iganna/popdisp> and <https://github.com/iganna/migadmi>.

908

## 909 Acknowledgements

910 The research was supported by RFBR grant 18-29-13033 to A.A.I., M.G.S. and S.V.N.; by a  
911 cooperative agreement from the United States Agency for International Development under  
912 the Feed the Future Program AID-OAA-A-14-00008 to S.V.N., E.J.B.v.W.; and a grant from the  
913 James H. Zumberge Faculty Research and Innovation Fund to S.V.N. and T.L. E.J.B.v.W. is  
914 further supported by the USDA Hatch program through the Vermont State Agricultural  
915 Experimental Station.

916 We would like to thank Magnus Nordborg for discussions and his helpful advice on the paper  
917 structure.

918

919

## 920 References

921 Abbo S, Berger J, Turner NC. 2003a. Viewpoint: Evolution of cultivated chickpea: four  
922 bottlenecks limit diversity and constrain adaptation. *Funct Plant Biol* **30**:1081.  
923 doi:10.1071/FP03084

924 Abbo S, Shtienberg D, Lichtenzweig J, Lev-Yadun S, Gopher A. 2003b. The Chickpea, Summer  
925 Cropping, and a New Model for Pulse Domestication in the Ancient Near East. *Q Rev Biol*  
926 **78**:435–448. doi:10.1086/378927

927 Abebe TD, Naz AA, Léon J. 2015. Landscape genomics reveal signatures of local adaptation in  
928 barley (*Hordeum vulgare* L.). *Front Plant Sci* **6**. doi:10.3389/fpls.2015.00813

929 Aitchison J. 1986. *The Statistical Analysis of Compositional Data*, London ; New York : Chapman  
930 and Hall.

931 Alexander DH, Novembre J, Lange K. 2009. Fast model-based estimation of ancestry in  
932 unrelated individuals. *Genome Res* **19**:1655–1664. doi:10.1101/gr.094052.109

933 Ancient World Mapping Center. n.d. Ancient World Mapping Center. *Univ North Carolina*.  
934 [http://awmc.unc.edu/awmc/map\\_data/shapefiles/strabo\\_data/](http://awmc.unc.edu/awmc/map_data/shapefiles/strabo_data/)

935 Behar DM, Yunusbayev B, Metspalu M, Metspalu E, Rosset S, Parik J, Rootsi S, Chaubey G,  
936 Kutuev I, Yudkovsky G, Khusnutdinova EK, Balanovsky O, Semino O, Pereira L, Comas D,  
937 Gurwitz D, Bonne-Tamir B, Parfitt T, Hammer MF, Skorecki K, Villems R. 2010. The  
938 genome-wide structure of the Jewish people. *Nature* **466**:238–242.  
939 doi:10.1038/nature09103



- 940 Bradburd GS, Ralph PL, Coop GM. 2013. DISENTANGLING THE EFFECTS OF GEOGRAPHIC AND  
941 ECOLOGICAL ISOLATION ON GENETIC DIFFERENTIATION. *Evolution (N Y)* **67**:3258–3273.  
942 doi:10.1111/evo.12193
- 943 Corinto GL. 2014. Nikolai Vavilov's Centers of Origin of Cultivated Plants With a View to  
944 Conserving Agricultural Biodiversity. *Hum Evol* **29**:285–301.
- 945 Douglas DH. 1994. Least-cost Path in GIS Using an Accumulated Cost Surface and Slopelines.  
946 *Cartogr Int J Geogr Inf Geovisualization* **31**:37–51. doi:10.3138/D327-0323-2JUT-016M
- 947 Felsenstein J. 1973. Maximum-likelihood estimation of evolutionary trees from continuous  
948 characters. *Am J Hum Genet* **25**:471–492.
- 949 Gautier M. 2015. Genome-Wide Scan for Adaptive Divergence and Association with  
950 Population-Specific Covariates. *Genetics* **201**:1555–1579.  
951 doi:10.1534/genetics.115.181453
- 952 Gorenflo LJ, Gale N. 1990. Mapping regional settlement in information space. *J Anthropol*  
953 *Archaeol* **9**:240–274. doi:10.1016/0278-4165(90)90008-2
- 954 Hellens RP, Moreau C, Lin-Wang K, Schwinn KE, Thomson SJ, Fiers MWEJ, Frew TJ, Murray SR,  
955 Hofer JMI, Jacobs JME, Davies KM, Allan AC, Bendahmane A, Coyne CJ, Timmerman-  
956 Vaughan GM, Ellis THN. 2010. Identification of Mendel's White Flower Character. *PLoS*  
957 *One* **5**:e13230. doi:10.1371/journal.pone.0013230
- 958 Herzog I. 2014. Least-cost Networks In: Verhagen P, Earl G, editors. Archaeology in the Digital  
959 Era. Amsterdam: Amsterdam University Press. pp. 237–248.  
960 doi:10.1515/9789048519590-026
- 961 Hijmans RJ, Cameron SE, Parra JL, Jones PG, Jarvis A. 2005. Very high resolution interpolated  
962 climate surfaces for global land areas. *Int J Climatol* **25**:1965–1978. doi:10.1002/joc.1276
- 963 Hoyt T, Schiavon S, Piccioli A, Cheung T, Moon D, Steinfeld K. 2013. CBE Thermal Comfort Tool.  
964 Center for the Built Environment, University of California Berkeley.  
965 <http://comfort.cbe.berkeley.edu/>
- 966 Jain M, Misra G, Patel RK, Priya P, Jhanwar S, Khan AW, Shah N, Singh VK, Garg R, Jeena G,  
967 Yadav M, Kant C, Sharma P, Yadav G, Bhatia S, Tyagi AK, Chattopadhyay D. 2013. A draft  
968 genome sequence of the pulse crop chickpea ( *Cicer arietinum* L.). *Plant J* **74**:715–729.  
969 doi:10.1111/tpj.12173
- 970 Kantner J. 1997. Ancient roads, modern mapping: Evaluating prehistoric Chaco Anasazi  
971 roadways using GIS technology. *Expedition* 49–61.
- 972 Lipson M, Loh P-R, Levin A, Reich D, Patterson N, Berger B. 2013. Efficient Moment-Based  
973 Inference of Admixture Parameters and Sources of Gene Flow. *Mol Biol Evol* **30**:1788–  
974 1802. doi:10.1093/molbev/mst099
- 975 Moreno M-T, Cubero JL. 1978. Variation in *Cicer arietinum* L. *Euphytica* **27**:465–485.  
976 doi:10.1007/BF00043173
- 977 Neal RM. 2012. MCMC using Hamiltonian dynamics.
- 978 Pawlowsky-Glahn V, Buccianti A. 2011. Compositional Data Analysis. Chichester, UK: John  
979 Wiley & Sons, Ltd. doi:10.1002/9781119976462
- 980 Pickrell JK, Pritchard JK. 2012. Inference of Population Splits and Mixtures from Genome-Wide  
981 Allele Frequency Data. *PLoS Genet* **8**:e1002967. doi:10.1371/journal.pgen.1002967
- 982 Purushothaman R, Upadhyaya HD, Gaur PM, Gowda CLL, Krishnamurthy L. 2014. Kabuli and  
983 desi chickpeas differ in their requirement for reproductive duration. *F Crop Res* **163**:24–  
984 31. doi:10.1016/j.fcr.2014.04.006
- 985 Roorkiwal M, von Wettberg EJ, Upadhyaya HD, Warschefsky E, Rathore A, Varshney RK. 2014.  
986 Exploring Germplasm Diversity to Understand the Domestication Process in *Cicer* spp.

- 987 Using SNP and DArT Markers. *PLoS One* **9**:e102016. doi:10.1371/journal.pone.0102016
- 988 Šavrič B, Jenny B, Jenny H. 2016. Projection Wizard – An Online Map Projection Selection Tool.
- 989 *Cartogr J* **53**:177–185. doi:10.1080/00087041.2015.1131938
- 990 Snyder JP. 1993. Flattening the Earth: Two Thousand Years of Map Projections. Chicago:
- 991 University of Chicago Press.
- 992 Sokolkova AB, Chang PL, Carrasquilla-Garcia N, Nuzhdina NV, Cook DR, Nuzhdin SV, Samsonova
- 993 MG. 2020. Signatures of Ecological Adaptation in Genomes of Chickpea Landraces.
- 994 *Biophys (Russian Fed)* **65**.
- 995 Tanno K, Willcox G. 2006. The origins of cultivation of *Cicer arietinum* L. and *Vicia faba* L.: early
- 996 finds from Tell el-Kerkh, north-west Syria, late 10th millennium b.p. *Veg Hist Archaeobot*
- 997 **15**:197–204. doi:10.1007/s00334-005-0027-5
- 998 Tobler W. 1993. Three presentations on geographical analysis and modeling: Non-isotropic
- 999 geographic modeling speculations on the geometry of geography global spatial analysis.
- 1000 *Tech Report, Natl Cent Geogr Inf Anal*.
- 1001 van der Maesen LJG. 1984. Taxonomy, Distribution and Evolution of the Chickpea and its Wild
- 1002 Relatives Genetic Resources and Their Exploitation — Chickpeas, Faba Beans and Lentils.
- 1003 Dordrecht: Springer Netherlands. pp. 95–104. doi:10.1007/978-94-009-6131-9\_9
- 1004 van Lanen RJ, Kosian MC, Groenewoudt BJ, Jansma E. 2015. Finding a Way: Modeling
- 1005 Landscape Prerequisites for Roman and Early-Medieval Routes in the Netherlands.
- 1006 *Geoarchaeology* **30**:200–222. doi:10.1002/gea.21510
- 1007 Varma Penmetsa R, Carrasquilla-Garcia N, Bergmann EM, Vance L, Castro B, Kassa MT, Sarma
- 1008 BK, Datta S, Farmer AD, Baek J, Coyne CJ, Varshney RK, Wettberg EJB, Cook DR. 2016.
- 1009 Multiple post-domestication origins of kabuli chickpea through allelic variation in a
- 1010 diversification-associated transcription factor. *New Phytol* **211**:1440–1451.
- 1011 doi:10.1111/nph.14010
- 1012 Varshney RK, Thudi M, Roorkiwal M, He W, Upadhyaya HD, Yang W, Bajaj P, Cubry P, Rathore
- 1013 A, Jian J, Doddamani D, Khan AW, Garg V, Chitikineni A, Xu D, Gaur PM, Singh NP,
- 1014 Chaturvedi SK, Nadigatla GVPR, Krishnamurthy L, Dixit GP, Fikre A, Kimurto PK, Sreeman
- 1015 SM, Bharadwaj C, Tripathi S, Wang J, Lee S-H, Edwards D, Polavarapu KKB, Penmetsa RV,
- 1016 Crossa J, Nguyen HT, Siddique KHM, Colmer TD, Sutton T, von Wettberg E, Vigouroux Y,
- 1017 Xu X, Liu X. 2019. Resequencing of 429 chickpea accessions from 45 countries provides
- 1018 insights into genome diversity, domestication and agronomic traits. *Nat Genet* **51**:857–
- 1019 864. doi:10.1038/s41588-019-0401-3
- 1020 Vavilov NA. 1926. Studies on the origin of cultivated plants. *Print House Gutenb*.
- 1021 Vavilov NI. 1951. The Origin, Variation, Immunity and Breeding of Cultivated Plants. *Soil Sci* **72**.
- 1022
- 1023

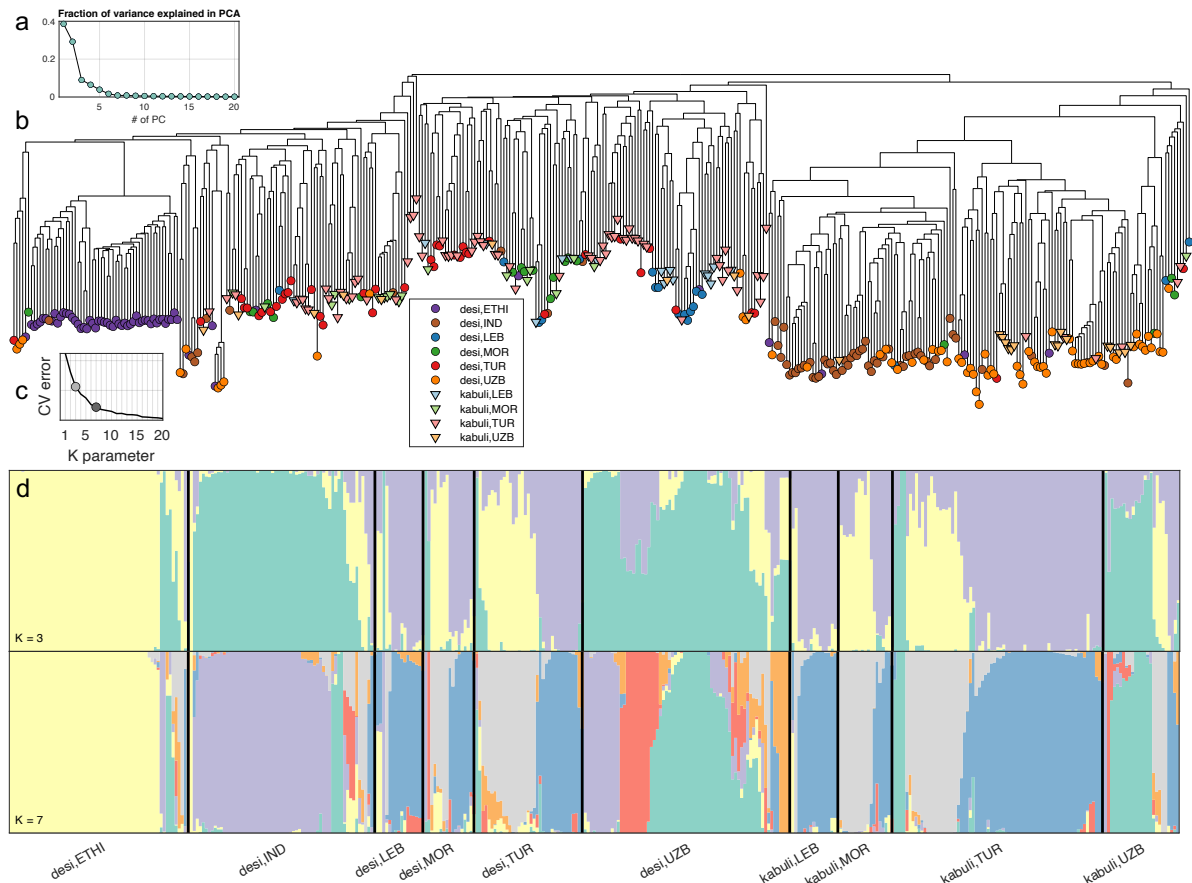

**Supplementary Figure 1.** Population structure of chickpea landraces. (a) proportion of variance explained by PCs in PCA analysis on all SNP data (b) Neighbor-joining tree of chickpea accessions using SNP-distance. The ten chickpea subpopulations are marked with different colors. (c) Cross-validation plot for different numbers of ancestral populations used in the ADMIXTURE program. The curve does not show a minimum, that is a criterion for K choice. Two points reflect cross-validation errors for runs demonstrated below. (d) Population structure inferred by ADMIXTURE analysis for K=3 and K=7. Each chickpea sample is represented by a stacked column with K components corresponding to estimated ancestral populations colored differently (components sum to 100%). Samples are ordered according to the ten chickpea subpopulations.

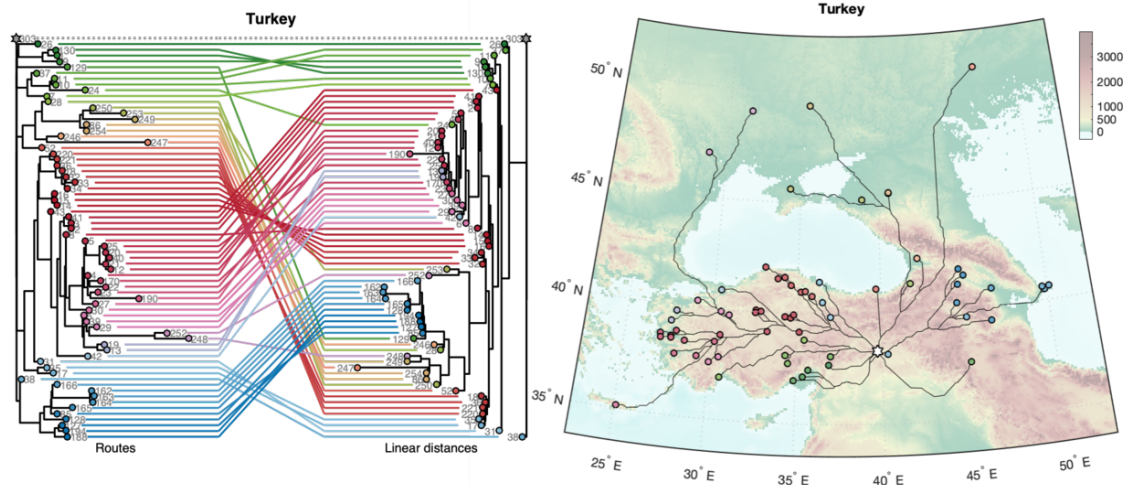

**Supplementary Figure 2.** Tanglegram for correspondence between routes and linear distances within the Turkey cluster. Routes of the Turkey cluster on Map; star denotes the center of the cluster.

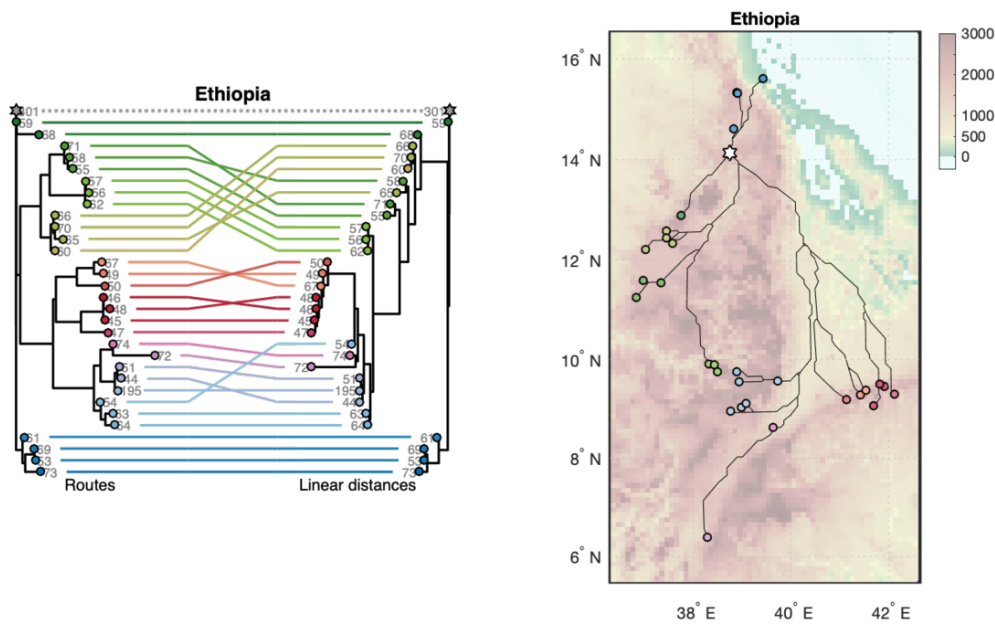

**Supplementary Figure 3.** Tanglegram for correspondence between routes and linear distances within the Ethiopia cluster. Routes of the Ethiopia cluster on Map; star denotes the center of the cluster.

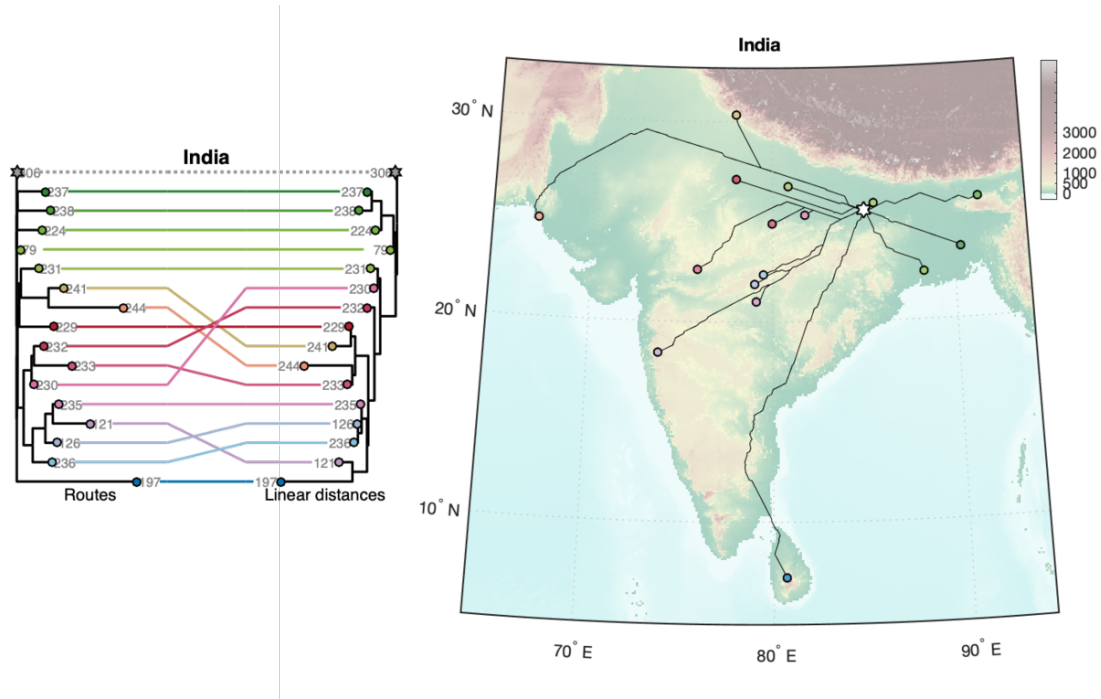

**Supplementary Figure 4.** Tanglegram for correspondence between routes and linear distances within the India cluster. Routes of the India cluster on Map; star denotes the center of the cluster.

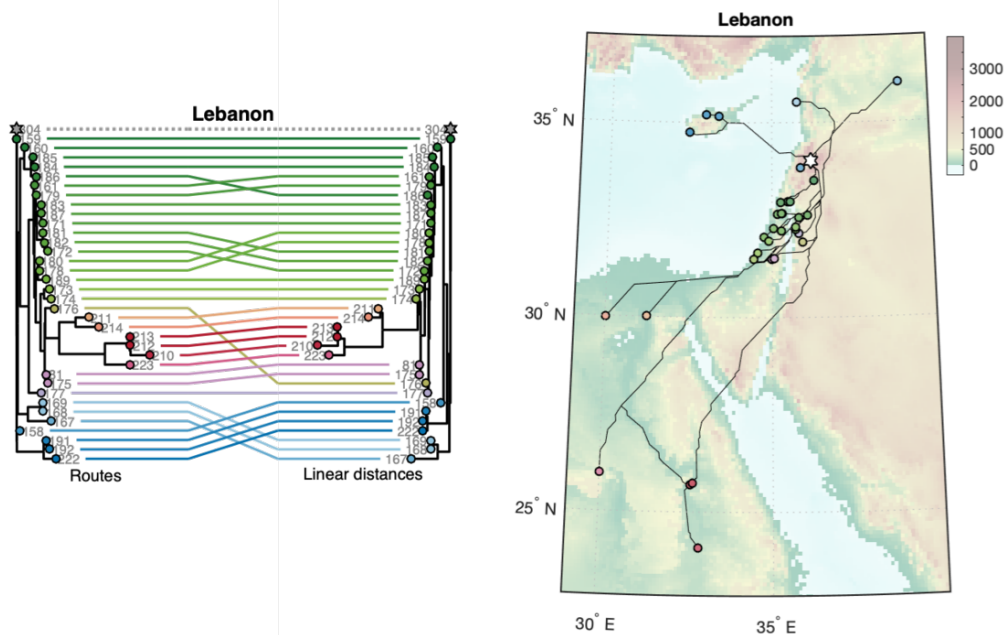

**Supplementary Figure 5.** Tanglegram for correspondence between routes and linear distances within the Lebanon cluster. Routes of the Lebanon cluster on Map; star denotes the center of the cluster.



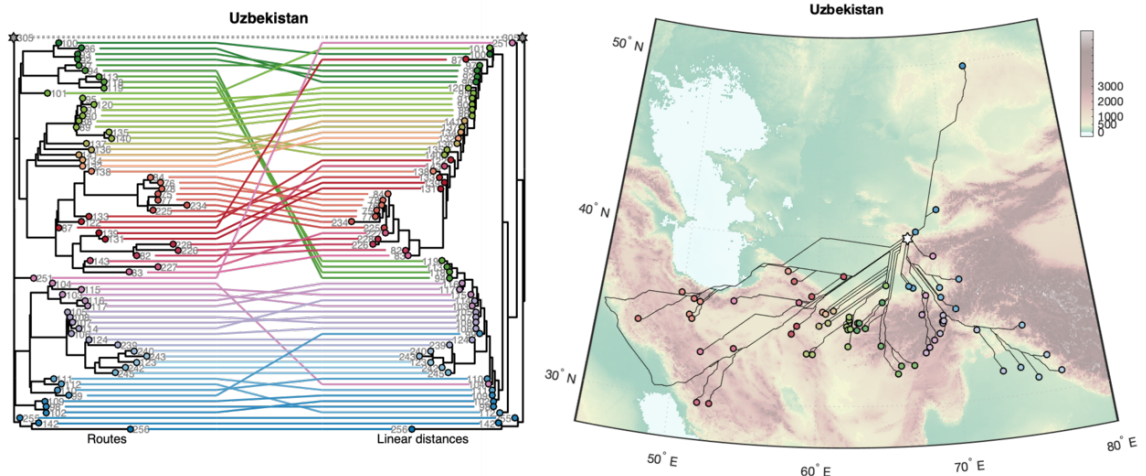

**Supplementary Figure 6.** Tanglegram for correspondence between routes and linear distances within the Uzbekistan cluster. Routes of the Uzbekistan cluster on Map; star denotes the center of the cluster.

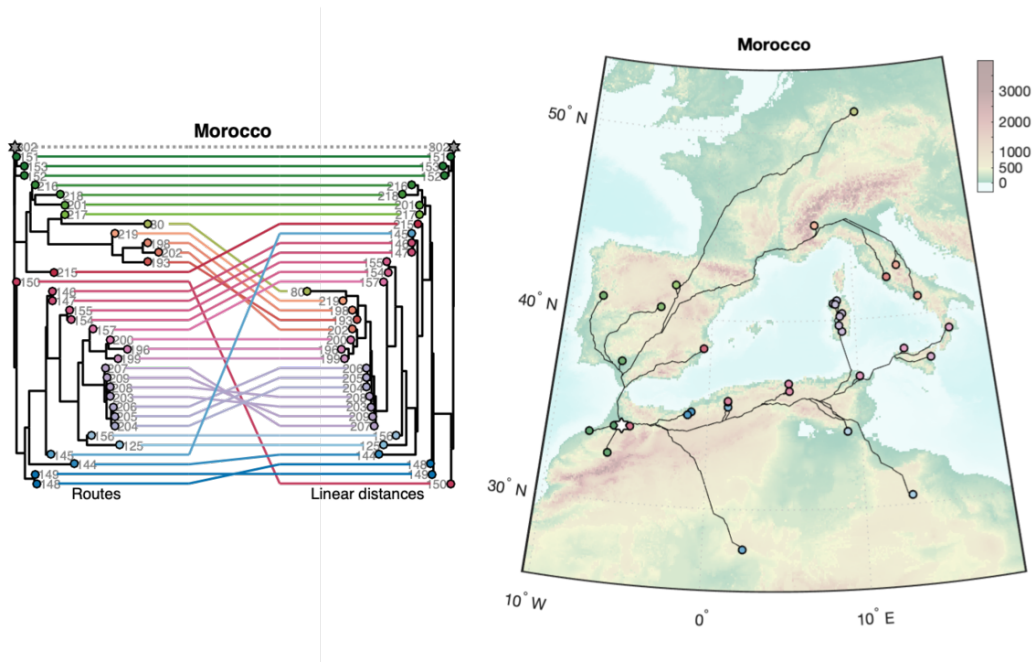

**Supplementary Figure 7.** Tanglegram for correspondence between routes and linear distances within the Uzbekistan cluster. Routes of the Uzbekistan cluster on Map; star denotes the center of the cluster.

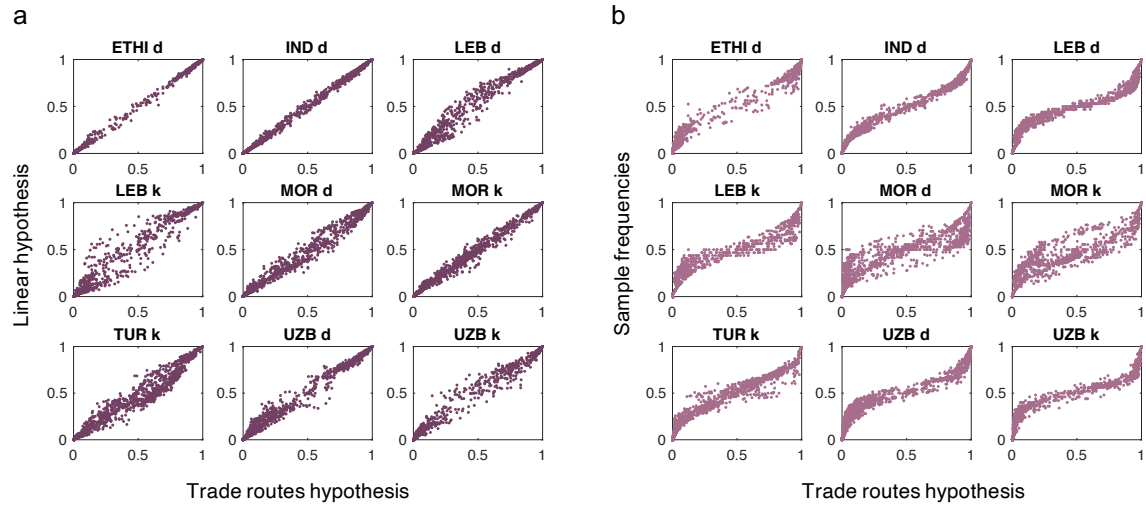

**Supplementary Figure 8.** (a) Correspondence between allele frequencies estimated with **popdisp** under trade routes hypothesis and linear hypothesis. (a) Correspondence between allele frequencies estimated with **popdisp** under trade routes hypothesis and mean allele frequencies in populations.

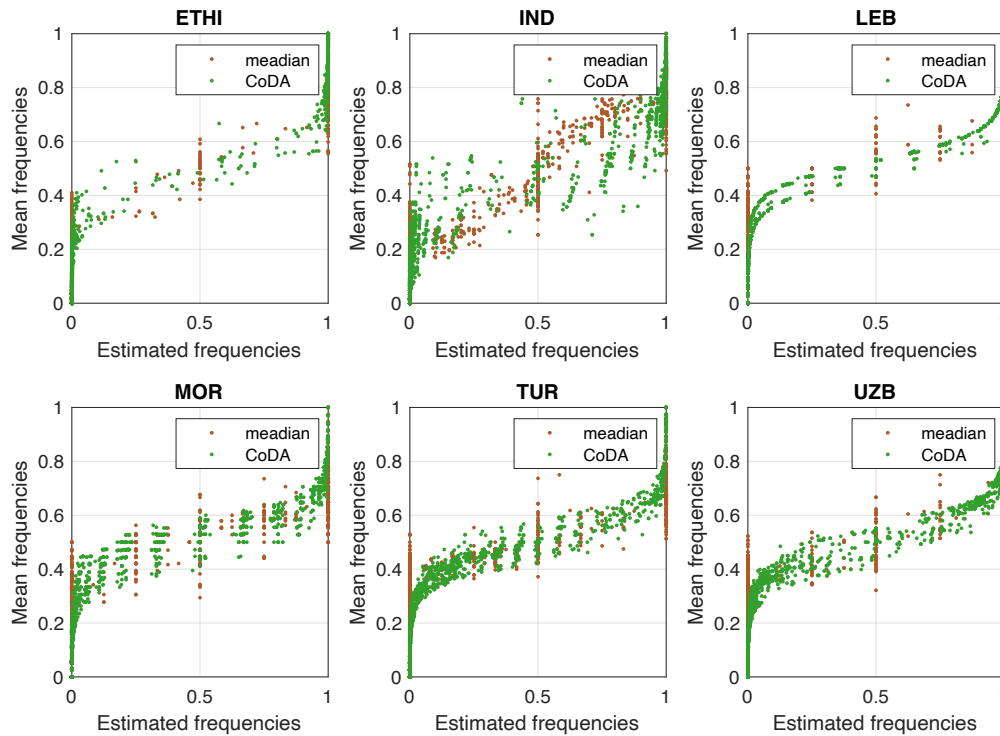

**Supplementary Figure 9.** Correspondence between mean SNP frequencies in 6 desi populations and SNP frequencies estimated by two more robust methods. For each method, we took into account the regional distribution of samples: samples in each population belong to  $n$  geographical locations. For each SNP, we estimated the mean allele frequency in each location,  $\{f_j\}_{j=1,n}$ , and then applied two methods. The first method (brown dots) reflects the median values across  $\{f_j\}_{j=1,n}$ . The second method (green dots) corresponds to the calculation of the center composition as in the compositional data analysis (CoDA). Together with mean allele frequencies in locations, this method considers frequencies of the second allele of the SNP,  $\{f'_j : f'_j = 1 - f_j\}_{j=1,n}$ . Then, it computes geometric mean on frequencies of each allele:  $g = \sqrt[n]{\prod_{j=1}^n f_j}$  and  $g' = \sqrt[n]{\prod_{j=1}^n f'_j}$ . At last, it applies so-called closure function to obtained geometric means:  $(f, f') = C(g, g') = \left(\frac{g}{g+g'}, \frac{g'}{g+g'}\right)$  (Pawlowsky-Glahn and Buccianti 2011). Obtained  $f$  values for each SNP are “averaged” allele frequencies in a population in line with CoDA. Analysis of brown dots shows long vertical ranges at 0 and 1, indicating the prevalence of locations with homozygous SNPs, which is not caught by calculations of means. The CoDA-based method not only highlights the prevalence of SNP homozygosity but also softly accounts for minor heterozygosity. As our popdisp method, both methods (more robust than mean values) demonstrate S-like shape dependency between the mean and estimated SNP frequencies.



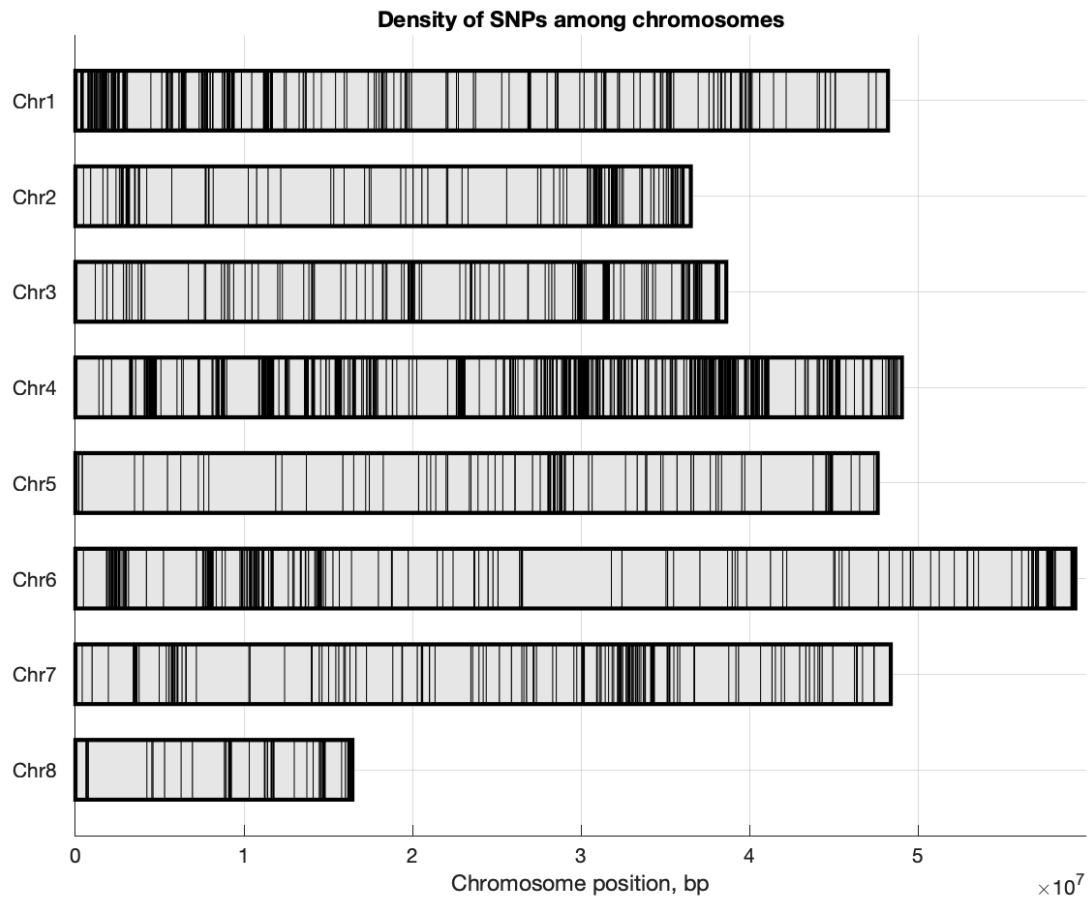

**Supplementary Figure 10.** Density of SNPs along the chromosomes. Each vertical line corresponds to the position of one SNP.
